# Supplementary material for: Reconstructing Macroevolutionary Patterns in Avian MHC Architecture With Genomic Data
Source: Front Genet. 2022 Feb 17;13:823686. doi: 10.3389/fgene.2022.823686 (PMC8893315; doi:10.3389/fgene.2022.823686)
Supplement: Supplementary file 2 [file DataSheet2.xlsx]

## Sheet: TableS1
TableS1 The TGS-based genome data used in this study. According to the Peters' Check-list of the Birds of the World Database, the names and orders of species. In the previous study column, Y means copy number of class I and II were reported in KeHe 2020, N means reported here for the first time. S, C, and U in Assembly level mean scaffold, chromosome, and unknown, respectively.
Order	Species	Speciescommon name	Short name	Previous study	Assembly level	GenBank assembly accession	Reference	Submitter
Anseriformes	Anas platyrhynchos	Mallard	AnaPla	Y	C	GCA_015476345.1 and GCA_900411745.1 1	(Li et al., 2021)	Zhejiang University
Anseriformes	Anser cygnoides	Swan goose	AnsCyg	N	S	GCA_013030995.1	(Li et al., 2020)	Poultry Science Institute
Anseriformes	Cygnus atratus	Black swan	CygAtr	N	Contig	GCF_013377495.1	(Dudchenko et al., 2017)	The University of Queensland
Accipitriformes	Aquila chrysaetos	Golden eagle	AquChr	Y	S	GCA_900496995.3 （bAquChr1.2.primary.fa）	(Mead et al., 2021)	Wellcome Sanger Institute
Anseriformes	Aythya fuligula	Tufted duck	AytFul	Y	C	GCA_009819795.1	(Mueller et al., 2021)	Vertebrate Genomes Project
Anseriformes	Cygnus olor	Mute swan	CygOlo	Y	C	GCA_009769625.1	https://www.ncbi.nlm.nih.gov/assembly/GCA_009769625.1	Vertebrate Genomes Project
Apodiformes	Calypte anna	Anna's hummingbird	CalAnn	N	S	GCA_003957575.1	(Rhie et al., 2021)	Vertebrate Genomes Project
Bucerotiformes	Bucorvus abyssinicus	Abyssinian ground hornbill	BucAby	Y	C	GCA_009769605.1	https://www.ncbi.nlm.nih.gov/assembly/GCA_009769605.1	Vertebrate Genomes Project
Caprimulgiformes	Nyctibius grandis	Great potoo	NycGra	N	C	GCA_013368605.1	https://www.ncbi.nlm.nih.gov/assembly/GCA_013368605.1	Vertebrate Genomes Project
Cariamiformes	Cariama cristata	Red-legged seriema	CarCri	Y	C	GCA_009819825.1	https://www.ncbi.nlm.nih.gov/assembly/GCA_009819825.1	Vertebrate Genomes Project
Charadriiformes	Alca torda	Razorbill	AlcTor	Y	C	GCA_008658365.1	https://www.ncbi.nlm.nih.gov/bioproject/PRJNA554520/	G10K,Vertebrate Genomes Project
Charadriiformes	Pluvialis apricaria	European golden plover	PluApr	N	U	bPluApr1.pri.cur.20200728 2 (renew as GCA_017639485.1 in NCBI)	https://www.ncbi.nlm.nih.gov/assembly/GCA_017639485.1	G10K,Vertebrate Genomes Project
Charadriiformes	Sterna hirundo	Common tern	StrHir	Y	C	GCA_009819605.1	https://www.ncbi.nlm.nih.gov/assembly/GCA_009819605.1	Vertebrate Genomes Project
Columbiformes	Streptopelia turtur	European turtle dove	StrTur	Y	C	GCA_901699155.1	https://www.ncbi.nlm.nih.gov/assembly/GCA_901699155.1	Wellcome Sanger Institute Data Sharing
Coraciiformes	Merops nubicus	Carmine bee-eater	MerNub	Y	C	GCA_009819595.1	https://www.ncbi.nlm.nih.gov/assembly/GCA_009819595.1	Vertebrate Genomes Project
Cuculiformes	Cuculus canorus	Common cuckoo	CucCan	N	U	bCucCan1_t3.pri.asm.20201216 2 (renew as GCA_017976375.1 in NCBI)	https://www.ncbi.nlm.nih.gov/assembly/GCA_017976375.1	Vertebrate Genomes Project
Falconiformes	Falco naumanni	Lesser kestrel	FalNau	N	U	bFalNau1.pri.cur.20200818 2 （renew as GCA_017639645.1 in NCBI)	https://www.ncbi.nlm.nih.gov/assembly/GCA_017639645.1	Vertebrate Genomes Project
Falconiformes	Falco rusticolus	Gyr falcon	FalRus	N	C	GCA_015220075.1	https://www.ncbi.nlm.nih.gov/assembly/GCF_015220075.1	Vertebrate Genomes Project
Galliformes	Centrocercus minimus	Gunnison grouse	CenMin	Y	S	GCA_005890655.1	(Oh et al., 2019)	U.S. Geological Survey
Galliformes	Gallus gallus	Chicken	GalGal	Y	C	GCF_000002315.6	(Warren et al., 2017)	Genome Reference Consortium
Galliformes	Pavo cristatus	Indian peafowl	PavCri	Y	S	GCA_005519975.1	(Dhar et al., 2019)	DEPARTMENT OF BIOCHEMISTRY, ALL INDIA INSTITUTE OF MEDICAL SCIENCES(AIIMS), NEW DELHI, INDIA
Galliformes	Phasianus colchicus	Common pheasant	PhaCol	N	S	GCA_015227605.1	(He et al., 2021)	School of Agriculture and Biology, Shanghai Jiao Tong University
Gruiformes	Balearica regulorum	Grey crowned crane	BalReg	Y	C	GCA_011004875.1	https://www.ncbi.nlm.nih.gov/assembly/GCA_011004875.1	Vertebrate Genomes Project
Gruiformes	Grus nigricollis	black-necked crane	GruNig	Y	S	GCA_004360235.1	(Zhou et al., 2019)	Sichuan University
Musophagiformes	Tauraco erythrolophus	Red-crested turaco	TauEry	Y	C	GCA_009769465.1	https://www.ncbi.nlm.nih.gov/assembly/GCA_009769465.1	Vertebrate Genomes Project
Pelecaniformes	Ciconia maguari	Maguari stork	CicMag	N	S	GCA_017639555.1	https://www.ncbi.nlm.nih.gov/assembly/GCA_017639555.1	Vertebrate Genomes Project
Phoenicopteriformes	Picoides pubescens	American flamingo	PhoRub	Y	C	GCA_009819775.1	https://www.ncbi.nlm.nih.gov/assembly/GCA_009819775.1	Vertebrate Genomes Project
Piciformes	Picoides pubescens	Downy woodpecker	Picpub	N	C	GCA_014839835.1	https://www.ncbi.nlm.nih.gov/assembly/GCA_014839835.1	Vertebrate Genomes Project
Piciformes	Pogoniulus pusillus	Red-fronted Tinkerbird	PogPus	N	C	GCA_015220805.1	https://www.ncbi.nlm.nih.gov/assembly/GCA_015220805.1	Vertebrate Genomes Project
Psittaciformes	Melopsittacus undulatus	Budgerigar	MelUnd	Y	C	GCA_012275295.1	https://www.ncbi.nlm.nih.gov/assembly/GCF_012275295.1/	G10K
Psittaciformes	Strigops habroptila	Kakapo	StrHab	Y	C	GCA_004027225.2	(Rhie et al., 2021)	Vertebrate Genomes Project
Pteroclidiformes	Pterocles gutturalis	Yellow-throated sandgrouse	PteGut	Y	C	GCA_009769525.1	https://www.ncbi.nlm.nih.gov/assembly/GCA_009769525.1	Vertebrate Genomes Project
Passeriformes	Acanthisitta chloris	Rifleman	AcaChl	Y	C	GCA_016904835.1	https://www.ncbi.nlm.nih.gov/assembly/GCA_016904835.1	Vertebrate Genomes Project
Passeriformes	Catharus ustulatus	Swainson's thrush	CatUst	Y	C	GCA_009819885.2	https://www.ncbi.nlm.nih.gov/assembly/GCF_009819885.2	Vertebrate Genomes Project
Passeriformes	Chiroxiphia lanceolate	Lance-tailed manakin	ChiLan	Y	C	GCA_009829145.1	https://www.ncbi.nlm.nih.gov/assembly/GCF_009829145.1	Vertebrate Genomes Project
Passeriformes	Corvus hawaiiensis	Hawaiian crow	CorHaw	Y	Contig	GCA_003402825.1	(Sutton et al., 2018)	University of Hawaii
Passeriformes	Corvus moneduloides	New Caledonian crow	CorMon	Y	C	GCA_009650955.1	https://www.ncbi.nlm.nih.gov/assembly/GCF_009650955.1	Vertebrate Genomes Project
Passeriformes	Eopsaltria australis	Eastern yellow robin	EopAus	Y	S	GCA_003426825.1	(Gan et al., 2019)	Deakin University
Passeriformes	Geothlypis trichas	Common yellowthroat	GeoTri	Y	C	GCA_009764595.1	https://www.ncbi.nlm.nih.gov/assembly/GCA_009764595.1	G10K，Vertebrate Genomes Project
Passeriformes	Hirundo rustica	Barn swallow	HirRus	Y	S	GCA_003692655.1	(Formenti et al., 2019)	University of Milan
Passeriformes	Manacus vitellinus	Golden-collared manakin	ManVit	Y	S	GCF_001715985.2	(Zhang et al., 2014)	Smithsonian Institution National Museum of Natural History
Passeriformes	Pipra filicauda	Wire-tailed manakin	PipFil	Y	S	GCF_003945595.1	(Horton et al., 2020)	Smithsonian Institution
Passeriformes	Sporophila hypoxantha	Tawny-bellied seedeater	SpoHyp	Y	S	GCA_002167245.1	(Campagna et al., 2017)	Cornell University
Passeriformes	Sylvia atricapilla	Eurasian blackcap	SylAtr	Y	C	GCA_009819655.1	https://www.ncbi.nlm.nih.gov/assembly/GCA_009819655.1	Vertebrate Genomes Project
Passeriformes	Taeniopygia guttata	Zebra finch	TaeGut	Y	C	GCA_008822105.2	(Rhie et al., 2021)	Vertebrate Genomes Project
Palaeognathae	Dromaius novaehollandiae	Emu	DroNov	N	C	GCA_016128335.1	(Liu et al., 2021)	Zhejiang University
Note:1 There are four versions of TGS-based genome data for mallard, and we chose the newest ones (published in 2020).
2 The data were only found in VGP, not in NCBI.
Reference
Campagna, L., Repenning, M., Silveira, L.F., Fontana, C.S., Tubaro, P.L., and Lovette, I.J. (2017). Repeated divergent selection on pigmentation genes in a rapid finch radiation. Sci Adv 3, e1602404.
Dhar, R., Seethy, A., Pethusamy, K., Singh, S., Rohil, V., Purkayastha, K., Mukherjee, I., Goswami, S., Singh, R., Raj, A., Srivastava, T., Acharya, S., Rajashekhar, B., and Karmakar, S. (2019). De novo assembly of the Indian blue peacock (Pavo cristatus) genome using Oxford Nanopore technology and Illumina sequencing. Gigascience 8.
Dudchenko, O., Batra, S.S., Omer, A.D., Nyquist, S.K., Hoeger, M., Durand, N.C., Shamim, M.S., Machol, I., Lander, E.S., Aiden, A.P., and Aiden, E.L. (2017). De novo assembly of the Aedes aegypti genome using Hi-C yields chromosome-length scaffolds. Science (New York, N.Y.) 356, 92-95.
Feng, S., Stiller, J., Deng, Y., Armstrong, J., Fang, Q., Reeve, A.H., Xie, D., Chen, G., Guo, C., Faircloth, B.C., Petersen, B., Wang, Z., Zhou, Q., Diekhans, M., Chen, W., Andreu-Sánchez, S., Margaryan, A., Howard, J.T., Parent, C., Pacheco, G., Sinding, M.S., Puetz, L., Cavill, E., Ribeiro Â, M., Eckhart, L., Fjeldså, J., Hosner, P.A., Brumfield, R.T., Christidis, L., Bertelsen, M.F., Sicherit…
Formenti, G., Chiara, M., Poveda, L., Francoijs, K.J., Bonisoli-Alquati, A., Canova, L., Gianfranceschi, L., Horner, D.S., and Saino, N. (2019). SMRT long reads and Direct Label and Stain optical maps allow the generation of a high-quality genome assembly for the European barn swallow (Hirundo rustica rustica). Gigascience 8.
Gan, H.M., Falk, S., Morales, H.E., Austin, C.M., Sunnucks, P., and Pavlova, A. (2019). Genomic evidence of neo-sex chromosomes in the eastern yellow robin. Gigascience 8.
He, C., Zhao, L., Xiao, L., Xu, K., Ding, J., Zhou, H., Zheng, Y., Han, C., Akinyemi, F., Luo, H., Yang, L., Luo, L., Yuan, H., Lu, X., and Meng, H. (2021). Chromosome level assembly reveals a unique immune gene organization and signatures of evolution in the common pheasant. Mol Ecol Resour 21, 897-911.
Horton, B.M., Ryder, T.B., Moore, I.T., and Balakrishnan, C.N. (2020). Gene expression in the social behavior network of the wire-tailed manakin (Pipra filicauda) brain. Genes Brain Behav 19, e12560.
Jiang, F., Jiang, Y., Wang, W., Xiao, C., Lin, R., Xie, T., Sung, W.K., Li, S., Jakovlić, I., Chen, J., and Du, X. (2021). A chromosome-level genome assembly of Cairina moschata and comparative genomic analyses. BMC Genomics 22, 581.
Le Duc, D., Renaud, G., Krishnan, A., Almén, M.S., Huynen, L., Prohaska, S.J., Ongyerth, M., Bitarello, B.D., Schiöth, H.B., Hofreiter, M., Stadler, P.F., Prüfer, K., Lambert, D., Kelso, J., and Schöneberg, T. (2015). Kiwi genome provides insights into evolution of a nocturnal lifestyle. Genome Biol 16, 147.
Li, J., Zhang, J., Liu, J., Zhou, Y., Cai, C., Xu, L., Dai, X., Feng, S., Guo, C., Rao, J., Wei, K., Jarvis, E.D., Jiang, Y., Zhou, Z., Zhang, G., and Zhou, Q. (2021). A new duck genome reveals conserved and convergently evolved chromosome architectures of birds and mammals. Gigascience 10.
Li, Y., Gao, G., Lin, Y., Hu, S., Luo, Y., Wang, G., Jin, L., Wang, Q., Wang, J., Tang, Q., and Li, M. (2020). Pacific Biosciences assembly with Hi-C mapping generates an improved, chromosome-level goose genome. Gigascience 9.
Liu, J., Wang, Z., Li, J., Xu, L., Liu, J., Feng, S., Guo, C., Chen, S., Ren, Z., Rao, J., Wei, K., Chen, Y., Jarvis, E.D., Zhang, G., and Zhou, Q. (2021). A new emu genome illuminates the evolution of genome configuration and nuclear architecture of avian chromosomes. Genome Res 31, 497-511.
Mead, D., Ogden, R., Meredith, A., Peniche, G., Smith, M., Corton, C., Oliver, K., Skelton, J., Betteridge, E., Doulcan, J., Holmes, N., Wright, V., Loose, M., Quail, M., Mccarthy, S., Howe, K., Chow, W., Torrance, J., Collins, J., Challis, R., Durbin, R., and Blaxter, M. (2021). The genome sequence of the European golden eagle, Aquila chrysaetos chrysaetos Linnaeus 1758 [version 1; peer review: …
Mueller, R.C., Ellström, P., Howe, K., Uliano-Silva, M., Kuo, R.I., Miedzinska, K., Warr, A., Fedrigo, O., Haase, B., Mountcastle, J., Chow, W., Torrance, J., Wood, J.M.D., Järhult, J.D., Naguib, M.M., Olsen, B., Jarvis, E.D., Smith, J., Eöry, L., and Kraus, R.H.S. (2021). A high-quality genome and comparison of short- versus long-read transcriptome of the palaearctic duck Aythya fuligula (tufted…
Oh, K.P., Aldridge, C.L., Forbey, J.S., Dadabay, C.Y., and Oyler-Mccance, S.J. (2019). Conservation Genomics in the Sagebrush Sea: Population Divergence, Demographic History, and Local Adaptation in Sage-Grouse (Centrocercus spp.). Genome Biol Evol 11, 2023-2034.
Pujolar, J.M., Dalén, L., Olsen, R.A., Hansen, M.M., and Madsen, J. (2018). First de novo whole genome sequencing and assembly of the pink-footed goose. Genomics 110, 75-79.
Rhie, A., Mccarthy, S.A., Fedrigo, O., Damas, J., Formenti, G., Koren, S., Uliano-Silva, M., Chow, W., Fungtammasan, A., Kim, J., Lee, C., Ko, B.J., Chaisson, M., Gedman, G.L., Cantin, L.J., Thibaud-Nissen, F., Haggerty, L., Bista, I., Smith, M., Haase, B., Mountcastle, J., Winkler, S., Paez, S., Howard, J., Vernes, S.C., Lama, T.M., Grutzner, F., Warren, W.C., Balakrishnan, C.N., Burt, D., Georg…
Sackton, T.B., Grayson, P., Cloutier, A., Hu, Z., Liu, J.S., Wheeler, N.E., Gardner, P.P., Clarke, J.A., Baker, A.J., Clamp, M., and Edwards, S.V. (2019). Convergent regulatory evolution and loss of flight in paleognathous birds. Science 364, 74-78.
Sutton, J.T., Helmkampf, M., Steiner, C.C., Bellinger, M.R., Korlach, J., Hall, R., Baybayan, P., Muehling, J., Gu, J., Kingan, S., Masuda, B.M., and Ryder, O.A. (2018). A High-Quality, Long-Read De Novo Genome Assembly to Aid Conservation of Hawaii's Last Remaining Crow Species. Genes (Basel) 9.
Wang, W., Wang, F., Hao, R., Wang, A., Sharshov, K., Druzyaka, A., Lancuo, Z., Shi, Y., and Feng, S. (2020). First de novo whole genome sequencing and assembly of the bar-headed goose. PeerJ 8, e8914.
Warren, W.C., Hillier, L.W., Tomlinson, C., Minx, P., Kremitzki, M., Graves, T., Markovic, C., Bouk, N., Pruitt, K.D., Thibaud-Nissen, F., Schneider, V., Mansour, T.A., Brown, C.T., Zimin, A., Hawken, R., Abrahamsen, M., Pyrkosz, A.B., Morisson, M., Fillon, V., Vignal, A., Chow, W., Howe, K., Fulton, J.E., Miller, M.M., Lovell, P., Mello, C.V., Wirthlin, M., Mason, A.S., Kuo, R., Burt, D.W., Dodg…
Zhang, G., Li, B., Li, C., Gilbert, M.T., Jarvis, E.D., and Wang, J. (2014a). Comparative genomic data of the Avian Phylogenomics Project. Gigascience 3, 26.
Zhang, G., Li, C., Li, Q., Li, B., Larkin, D.M., Lee, C., Storz, J.F., Antunes, A., Greenwold, M.J., Meredith, R.W., Ödeen, A., Cui, J., Zhou, Q., Xu, L., Pan, H., Wang, Z., Jin, L., Zhang, P., Hu, H., Yang, W., Hu, J., Xiao, J., Yang, Z., Liu, Y., Xie, Q., Yu, H., Lian, J., Wen, P., Zhang, F., Li, H., Zeng, Y., Xiong, Z., Liu, S., Zhou, L., Huang, Z., An, N., Wang, J., Zheng, Q., Xiong, Y., Wang…
Zhou, C., Yu, H., Geng, Y., Liu, W., Zheng, S., Yang, N., Meng, Y., Dou, L., Price, M., Ran, J., Yue, B., and Wu, Y. (2019). A High-Quality Draft Genome Assembly of the Black-Necked Crane (Grus nigricollis) Based on Nanopore Sequencing. Genome Biol Evol 11, 3332-3340.

## Sheet: TableS2
Table S2. The information of Palaeognathae genomes.
Species	Species-Common Name	Short name	Sequencing methods	GenBank assembly accession	Gene Structure				Reference	Submitter
					Ancient pattern	I-IIB related region	IIA-IIB	IIA-COL11A2
Apteryx haastii	Great spotted kiwi	Apthas	Illumina HiSeq	GCA_003342985.1	-	Y	-	Y	(Sackton et al., 2019)	Harvard University
Eudromia elegans	Elegant crested-tinamou	Eudele	Illumina HiSeq	GCA_003342815.1	Y	Y	Y	Y	(Sackton et al., 2019)	Harvard University
Rhea pennata	Rhea pennata	Rhepen	Illumina HiSeq	GCA_003342835.1	Y	Y	Y	Y	(Sackton et al., 2019)	Harvard University
Dromaius novaehollandiae	Emu	Dronov	PacBio RSII	GCA_016128335.1	-	N	No IIA	No IIA	(Liu et al., 2021)	Zhejiang University
Casuarius casuarius	Southern cassowary	Cascas	Illumina HiSeq	GCA_003342895.1	N	N	Y	Y	(Sackton et al., 2019)	Harvard University
Anomalopteryx didiformis	Little Bush Moa	Anodid	Illumina HiSeq	GCA_003342905.1	Y	Y	No IIA	No IIA	(Sackton et al., 2019)	Harvard University
Rhea americana	Greater rhea	Rheame	Illumina HiSeq	GCA_003343005.1	Y	Y	Y	Y	(Sackton et al., 2019)	Harvard University
Apteryx owenii	Llittle spotted kiwi	Aptowe	Illumina HiSeq	GCA_003342965.1	N	Y1	Y	Y	(Sackton et al., 2019)	Harvard University
Tinamus guttatus	White-throated tinamou	Tingut	Illumina HiSeq	GCA_000705375.2	-	N	Y	N	(Zhang et al., 2014b)	BGI
Apteryx rowi	Okarito brown kiwi	Aptrow	Illumina HiSeq	GCF_003343035.1	N	Y1	Y	Y	(Sackton et al., 2019)	Harvard University
Crypturellus cinnamomeus	Thicket tinamou	Crycin	Illumina HiSeq	GCA_003342915.1	N	N	Y	Y	(Sackton et al., 2019)	Harvard University
Crypturellus undulatus	Undulated Tinamou	Cryund	Illumina HiSeq	GCA_013389825.1	-	N	Y	N	(Feng et al., 2020)	B10K Consortium
Crypturellus soui	Little Tinamou	Crysou	Illumina HiSeq	GCA_013389845.1	-	N	Y	N	(Feng et al., 2020)	B10K Consortium
Nothoprocta ornata	Ornate Tinamou	Notorn	Illumina HiSeq	GCA_013398335.1	N	N	Y	Y	(Feng et al., 2020)	B10K Consortium
Nothocercus julius	Tawny-breasted Tinamou	Notjul	Illumina HiSeq	GCA_013398735.1	Y	Y	Y	Y	(Feng et al., 2020)	B10K Consortium
Nothoprocta pentlandii	Andean Tinamou	Notpen	Illumina HiSeq	GCA_013398315.1	N	N	Y	Y	(Feng et al., 2020)	B10K Consortium
Nothocercus nigrocapillus	Hooded Tinamou	Notnig	Illumina HiSeq	GCA_013398345.1	N	N	Y	Y	(Feng et al., 2020)	B10K Consortium
Nothoprocta perdicaria	Chilean tinamou	Notper	Illumina HiSeq	GCF_003342845.1	Y	Y	Y	Y	(Sackton et al., 2019)	Harvard University
Struthio camelus	African ostrich	Strcam	Illumina HiSeq	GCA_000698965.1	Y	Y	Y	Y	(Zhang et al., 2014b)	BGI
Apteryx mantelli	North Island Kiwi	Aptman	Illumina HiSeq	GCA_001039765.1	-	Y1	Y	N	(Le Duc et al., 2015)	MPI-EVA

## Sheet: TableS3
Table S3. The information of Anseriformes genomes. S and C in Assembly level mean scaffold and chromosome, respectively.
Species	Species-Common Name	Short name	Sequencing methods	Assembly level	GenBank assembly accession	Reference	Submitter
Anser cygnoides	Swan goose	AnsCyg	TGS	S	GCA_013030995.1	(Li et al., 2020)	Poultry Science Institute
Anas platyrhynchos	Mallard	AnaPla	TGS	C	GCF_015476345.1	(Li et al., 2021)	Zhejiang University
Anas zonorhyncha	Eastern spot-billed duck	AnaZon	SGS	S	GCA_002224875.1	(Feng et al., 2020)	BGI
Anser brachyrhynchus	Pink-footed goose	AnsBra	SGS	S	GCA_002592135.1	(Pujolar et al., 2018)	Aarhus University, Denmark
Anser indicus	Bar-headed goose	AnsInd	SGS	S	GCA_006229135.1	(Wang et al., 2020)	State Key Laboratory of Plateau Ecology and Agriculture, Qinghai University
Anseranas semipalmata	Magpie goose	AnsSem	SGS	S	GCA_013399115.1	(Feng et al., 2020)	B10K Consortium
Asarcornis scutulata	White-winged wood duck	AsaScu	10X Genomics linked reads	S	GCA_013398475.1	(Feng et al., 2020)	B10K Consortium
Aythya fuligula	Tufted duck	AytFul	TGS	C	GCA_009819795.1	(Mueller et al., 2021)	Vertebrate Genomes Project
Branta canadensis	Canada goose	BraCan	SGS	S	GCA_006130075.1	CanSeq150 Project	Canada's Genomic Enterprise
Cairina moschata	Muscovy duck	CaiMos	SGS	C	GCA_009194515.1	(Teissier et al., 2019)	McDonnell Genome Institute - Washington University School of Medicine
Chauna torquata	Southern screamer	ChaTor	SGS	S	GCA_013399475.1	(Feng et al., 2020)	B10K Consortium
Cygnus atratus	Black swan	CygAtr	TGS	Contig	GCF_013377495.1	(Dudchenko et al., 2017)	The University of Queensland
Cygnus cygnus	Common whooper	CygCyg	SGS	S	GCA_014362685.1	https://www.ncbi.nlm.nih.gov/assembly/GCA_014362685.1	Environmental Genomics Office, Center for Environmental Biology and Ecosystem Studies, National Institute for Environmental Studies
Cygnus olor	Mute swan	CygOlo	TGS	C	GCA_009769625.1	https://www.ncbi.nlm.nih.gov/assembly/GCA_009769625.1	Vertebrate Genomes Project
Heteronetta atricapilla	Black-headed duck	HetAtr	SGS	C	GCA_011075105.1	https://www.ncbi.nlm.nih.gov/assembly/GCA_011075105.1	Brood Parasitic Bird Genomes Consortium
Nettapus auritus	African pygmy goose	NetAur	SGS	C	GCA_011076525.1	https://www.ncbi.nlm.nih.gov/assembly/GCA_011076525.1	Brood Parasitic Bird Genomes Consortium
Oxyura jamaicensis	Ruddy duck	OxyJam	SGS	C	GCF_011077185.1	https://www.ncbi.nlm.nih.gov/assembly/GCF_011077185.1	Brood Parasitic Bird Genomes Consortium
Stictonetta naevosa	Freckled duck	StiNae	SGS	C	GCA_011074415.1	https://www.ncbi.nlm.nih.gov/assembly/GCA_011074415.1	Brood Parasitic Bird Genomes Consortium

## Sheet: TableS4
Table S4 GenBank ID as the query for Blast. A B and C mean used in TGS-based genomes, Anseriformes genomes, and Passerines genomes, respectively.
Genes	NCBI accession no.	Usage	Species
TAP1	AY023516 (extracted CDS)	A	Gallus gallus
	AY885227.1 (extracted CDS)	B	Anas platyrhynchos
TAP1-finch	XM_041712320.1	C	Taeniopygia guttata
TAP2	AY023516 (extracted CDS)	A	Gallus gallus
	AY885227.1 (extracted CDS)	B	Anas platyrhynchos
DMA	NM_001099353.2	A&B	Gallus gallus
DMB1	NM_001312902.1	A&B	Gallus gallus
DMB2	NM_001135166.1	A&B	Gallus gallus
TAPBL	FJ770458.1 (extracted CDS)	A&B	Gallus gallus
TAPBL-exon1	VXAA01007239.1 (77~431)1	B	Anseranas semipalmata
TAPBL-exon2	VXAA01007239.1(1316~1615) 1	B	Anseranas semipalmata
BRD2	AY023516	A	Gallus gallus
	XM_032205114.1	B	Aythya fuligula
I	Order consensus sequences from KeHe 2020	A&B
IIA	EF554707	A	Gallus gallus 2
	HM070250.1	A&B	Anas platyrhynchos 2
IIB	Order consensus sequences from KeHe 2020	A&B
COL11A2	KP182408.1 (extracted CDS)	A&B	Nippion nippion
Note: 1 Two sequences were from the Blast results using Gallus gallus's query and Anseranas semipalmata's CDS as database, then they were extracted and used as a query for TAPBL genes in Anseriformes. 2 The Gallus gallus's sequence was used in Galliformes, and Anas platyrhynchos for others. For mallard's as query can obtain complete region than chickens in non-Galliformes.

## Sheet: TableS5
Table S5 Gene arrangement of MHC-related gene in TGS-based avian genomes. -D and -p imply gene duplication and partial gene. The same contigs were marked with gray and white to be more apparent.
Species	Assembly level	Chromosome ID (if it has the corresponding one)	Defined class I or II related region	Gene	Contigs ID	Stard position	End position	Orientation
CenMin	scaffold			COL11A2	SPOS01000083.1	2902887	2920323	-
	scaffold		class I-related region	I1	SPOS01000396.1	24512	25637	+
	scaffold		class I-related region	TAP1	SPOS01000396.1	29673	31457	+
	scaffold		class I-related region	TAP2	SPOS01000396.1	32047	35212	-
	scaffold			DMB2	SPOS01000396.1	36771	38661	-
	scaffold			DMB1	SPOS01000396.1	39734	41521	-
	scaffold			DMA	SPOS01000396.1	42293	44495	-
	scaffold		class II-related region	BRD2	SPOS01000396.1	48138	53851	+
	scaffold		class II-related region	IIB1	SPOS01000396.1	55341	56155	-
	scaffold		class II-related region	TAPBL	SPOS01000396.1	57205	60848	+
	scaffold		class II-related region	IIB2	SPOS01000396.1	62227	63034	+
	scaffold			I2	SPOS01000498.1	30823	31959	-
	scaffold			IIB3	SPOS01000498.1	49248	50057	-
	scaffold			IIA	SPOS01000538.1	1108	5781	-
GalGal	Chromosome	# 8		COL11A2	NC_006095.5	11576206	11743370	+
	Chromosome	# 16	class II-related region	IIB2	NC_006103.5	2565233	2566961	-
	Chromosome	# 16	class II-related region	TAPBL	NC_006103.5	2567828	2571359	-
	Chromosome	# 16	class II-related region	IIB1	NC_006103.5	2572332	2573868	+
	Chromosome	# 16	class II-related region	BRD2	NC_006103.5	2574737	2578831	-
	Chromosome	# 16		DMA	NC_006103.5	2584405	2586614	+
	Chromosome	# 16		DMB1	NC_006103.5	2586768	2589041	+
	Chromosome	# 16		DMB2	NC_006103.5	2589313	2592248	+
	Chromosome	# 16	class I-related region	I1	NC_006103.5	2592998	2594903	+
	Chromosome	# 16	class I-related region	TAP1	NC_006103.5	2596216	2601012	-
	Chromosome	# 16	class I-related region	TAP2	NC_006103.5	2601568	2604604	+
	Chromosome	# 16	class I-related region	I2	NC_006103.5	2606805	2609008	-
	Chromosome	# 23		IIA	NC_006110.5	5959349	5959606	-
PavCri	scaffold			COL11A2	QZWQ01000092.1	870064	902985	+
	scaffold		class I-related region	TAP1	QZWQ01003722.1	51211	52792	+
	scaffold		class I-related region	TAP2	QZWQ01003722.1	53354	55182	+
	scaffold			DMB2	QZWQ01003722.1	55918	57784	-
	scaffold			DMB1	QZWQ01003722.1	58119	60252	-
	scaffold			DMA	QZWQ01003722.1	60388	62762	-
	scaffold		class II-related region	BRD2	QZWQ01003722.1	66302	72112	+
	scaffold		class II-related region	IIB	QZWQ01003722.1	74422	75132	-
	scaffold			TAP1-D	QZWQ01018043.1	1098	2679	+
	scaffold			TAP2-D	QZWQ01018043.1	3241	5938	+
	scaffold			TAPBL	QZWQ01030546.1	247	1122	+
	scaffold			IIA-p	QZWQ01177205.1	84	241	+
PhaCol	scaffold			COL11A2	WUCP01000021.1	3912759	3931456	+
	scaffold		class II-related region	IIB1	WUCP01000037.1	1650509	1651309	-
	scaffold		class II-related region	TAPBL	WUCP01000037.1	1653006	1656374	-
	scaffold		class II-related region	IIB2	WUCP01000037.1	1657181	1657987	+
	scaffold		class II-related region	BRD2	WUCP01000037.1	1659521	1665271	-
	scaffold			DMA	WUCP01000037.1	1671183	1669075	-
	scaffold			DMB1	WUCP01000037.1	1671564	1673939	-
	scaffold			DMB2	WUCP01000037.1	1674211	1676967	-
	scaffold		class I-related region	I1	WUCP01000037.1	1678038	1679163	+
	scaffold		class I-related region	TAP2	WUCP01000037.1	1681791	1684998	-
	scaffold		class I-related region	TAP1	WUCP01000037.1	1685572	1687485	-
	scaffold		class I-related region	I2	WUCP01000037.1	1691529	1692652	-
	scaffold			IIB3	WUCP01000038.1	714412	715218	-
BalReg	Chromosome	# 20		BRD2	CM021637.1	1376400	1392297	-
	Chromosome	# 20		COL11A2	CM021637.1	1864643	1904492	+
	Chromosome	# 32	class I-related region	I1	CM021649.1	673968	675585	-
	Chromosome	# 32		DMB2-p	CM021649.1	677691	678692	-
	Chromosome	# 32		DMB1-p	CM021649.1	681840	683224	-
	Chromosome	# 32		DMA	CM021649.1	684550	686762	-
	Chromosome	# 32	class II-related region	IIB1	CM021649.1	703929	704890	+
	Chromosome	# 32	class II-related region	IIB2	CM021649.1	707749	708710	-
	Chromosome	# 32	class II-related region	IIA	CM021649.1	710868	711509	+
	Chromosome	# 32	class I-related region	I2	CM021649.1	755776	757417	+
	Chromosome	# 32		DMB2	CM021649.1	771991	772980	+
	Chromosome	# 32		I3	CM021649.1	776234	777875	+
	Chromosome	# 32	class I-related region	TAP2	CM021649.1	781417	784925	-
	Chromosome	# 32	class I-related region	TAP1	CM021649.1	786165	787514	-
	Chromosome	# 32	class I-related region	I4	CM021649.1	828666	830295	-
	Chromosome	# 32	class I-related region	I5	CM021649.1	853355	855011	-
	scaffold			DMB1	JAAIYC010000039.1	23389	37961	+
GruNig	scaffold			I1	SMUU01000388.1	36546	38126	-
	scaffold			COL11A2	SMUU01000974.1	68601	82563	+
	scaffold			IIA	SMUU01000974.1	91884	93608	-
	scaffold			IIB1	SMUU01000974.1	94910	95879	+
	scaffold			BRD2	SMUU01000974.1	103804	109834	-
	scaffold			DMA	SMUU01001094.1	1733	4036	+
	scaffold			DMB1	SMUU01001094.1	5465	6884	+
	scaffold			DMB2	SMUU01001094.1	5465	6342	+
	scaffold			DMB2-D	SMUU01001094.1	9225	10071	+
	scaffold			I2	SMUU01001219.1	2718	4346	-
	scaffold			DMA-p	SMUU01001366.1	43387	43850	+
	scaffold			I3	SMUU01001588.1	2370	4011	-
	scaffold			TAP2	SMUU01001588.1	8540	12035	-
	scaffold			TAP1	SMUU01001588.1	13153	14523	-
	scaffold			IIB2	SMUU01001588.1	98766	99745	-
	scaffold			TAPBL	SMUU01001610.1	26434	34796	+
AlcTor	scaffold			TAP2-D	VMED01000052.1	269860	273453	+
	scaffold			I1	VMED01000052.1	277488	279102	-
	scaffold			I2	VMED01000052.1	320962	322570	+
	scaffold			TAP2	VMED01000052.1	326590	330807	-
	scaffold			I3	VMED01000052.1	336104	337736	-
	scaffold			TAP2-D	VMED01000052.1	344473	348880	+
	scaffold			I4	VMED01000052.1	352898	354503	-
	scaffold			COL11A2	VMED01000075.1	20	9511	+
	scaffold			IIA2	VMED01000075.1	18767	20451	-
	scaffold			IIB1	VMED01000075.1	21396	22333	+
	scaffold			IIA1	VMED01000075.1	23815	25565	-
	scaffold			IIB2	VMED01000075.1	26513	27443	+
	scaffold			BRD2	VMED01000075.1	29240	33795	-
	scaffold			DMA	VMED01000075.1	41431	43000	+
	scaffold			DMB1	VMED01000075.1	45724	45985	+
AquChr	scaffold			DMB2	scaffold_55_ctg1	126373	127823	-
	scaffold			DMB1-p	scaffold_55_ctg1	126589	127823	-
	scaffold			DMB1	scaffold_55_ctg1	130693	132812	-
	scaffold			DMB2	scaffold_55_ctg1	131433	132807	-
	scaffold			DMA	scaffold_55_ctg1	134233	136719	-
	scaffold			BRD2	scaffold_55_ctg1	142412	148342	+
	scaffold			IIB1	scaffold_55_ctg1	149895	150907	-
	scaffold			IIA1	scaffold_55_ctg1	152061	153963	+
	scaffold			IIB2	scaffold_55_ctg1	155251	156263	-
	scaffold			IIA2	scaffold_55_ctg1	157414	159315	+
	scaffold			IIB3	scaffold_55_ctg1	160604	161613	-
	scaffold			IIA3	scaffold_55_ctg1	162809	164713	+
	scaffold			COL11A2	scaffold_55_ctg1	174117	181426	+
	scaffold			I1	scaffold_61_ctg1	77125	78765	+
	scaffold			I2	scaffold_61_ctg1	90881	92541	+
	scaffold			TAP1	scaffold_61_ctg1	101288	102842	+
	scaffold			TAP2	scaffold_61_ctg1	105221	108732	+
	scaffold			I3	scaffold_61_ctg1	113549	115187	-
BucAby	Chromosome	# 33		COL11A2	CM020056.1	8645507	8683846	+
	scaffold			IIB1	WNMG01000043.1	318	1314	+
	scaffold			IIA1	WNMG01000043.1	5282	6201	-
	scaffold			IIB2	WNMG01000043.1	9837	10833	+
	scaffold			IIB3	WNMG01000043.1	15007	16003	+
	scaffold			IIA2	WNMG01000059.1	2712	3628	+
	scaffold			IIB4	WNMG01000082.1	8629	9607	-
	scaffold			IIB5	WNMG01000082.1	38889	39922	+
	scaffold			I1	WNMG01000082.1	56382	57623	+
	scaffold			I2	WNMG01000082.1	84046	90740	-
	scaffold			IIB6	WNMG01000082.1	100283	101274	+
	scaffold			IIB7	WNMG01000082.1	115575	116571	+
	scaffold			I3	WNMG01000082.1	120308	121409	+
	scaffold			I4	WNMG01000082.1	147725	148991	-
	scaffold			TAP2	WNMG01000082.1	188060	191325	-
	scaffold			TAP1	WNMG01000082.1	192717	194043	-
	scaffold			IIA3	WNMG01000110.1	1056	1975	+
	scaffold			IIB8	WNMG01000110.1	6027	7023	-
	scaffold			IIA4	WNMG01000110.1	10334	11253	+
	scaffold			IIA5	WNMG01000110.1	14672	15592	+
	scaffold			IIA6	WNMG01000110.1	19374	20293	+
	scaffold			BRD2	WNMG01000110.1	31657	26120	-
	scaffold			DMA-p	WNMG01000110.1	38595	40107	+
	scaffold			DMB1-p	WNMG01000110.1	43206	47116	-
	scaffold			DMB2-p	WNMG01000110.1	46962	47203	+
NycGra	Chromosome	# 10	class II-related region	IIB1	CM023741.1	12638465	12639419	+
	Chromosome	# 10	class II-related region	IIA1	CM023741.1	12641117	12642615	+
	Chromosome	# 10	class II-related region	IIB2	CM023741.1	12644052	12644052	+
	Chromosome	# 10	class II-related region	BRD2	CM023741.1	12648066	12653112	-
	Chromosome	# 10		DMA	CM023741.1	12660334	12661637	+
	Chromosome	# 10		DMB2	CM023741.1	12662409	12663998	+
	Chromosome	# 10		DMB1	CM023741.1	12662660	12664299	-
	Chromosome	# 10		DMB2-D	CM023741.1	12666997	12667683	+
	Chromosome	# 10	class I-related region	I1	CM023741.1	13616009	13617599	+
	Chromosome	# 10	class I-related region	I2	CM023741.1	13632874	13634454	+
	Chromosome	# 10	class I-related region	TAP1	CM023741.1	13643420	13645199	+
	Chromosome	# 10	class I-related region	TAP2	CM023741.1	13647663	13651609	+
	Chromosome	# 10	class I-related region	I3	CM023741.1	13655193	13656750	-
	Chromosome	# 10	class I-related region	I4	CM023741.1	13663922	13665723	+
	Chromosome	# 10	class I-related region	I5	CM023741.1	13676765	13676765	-
	Chromosome	# 16		COL11A2	CM023747.1	3373237	3408574	-
	Chromosome	# Z		IIB3	CM023769.1	78133363	78134317	+
	Chromosome	# Z		IIA2	CM023769.1	78135851	78137573	-
CarCri	Chromosome	# 21		DMB2	CM020268.1	157100	158123	-
	Chromosome	# 21		DMB1	CM020268.1	160162	161683	-
	Chromosome	# 21		DMB2-D	CM020268.1	160595	161535	-
	Chromosome	# 21		DMA-p	CM020268.1	162619	163594	-
	Chromosome	# 21	class II-related region	BRD2	CM020268.1	167827	173934	+
	Chromosome	# 21	class II-related region	IIB1	CM020268.1	175564	176567	-
	Chromosome	# 21	class II-related region	IIA1	CM020268.1	177700	179565	+
	Chromosome	# 21	class II-related region	IIB2	CM020268.1	181078	182081	-
	Chromosome	# 21	class II-related region	IIA2	CM020268.1	183216	185118	+
	Chromosome	# 21		COL11A2	CM020268.1	194202	206131	-
	Chromosome	# 21		TAPBL	CM020268.1	259495	261473	+
	Chromosome	# 21	class I-related region	I1	CM020268.1	360217	361600	+
	Chromosome	# 21	class I-related region	TAP2	CM020268.1	364051	367390	-
	Chromosome	# 21	class I-related region	TAP1	CM020268.1	368588	370080	-
	Chromosome	# 21	class I-related region	I2	CM020268.1	395244	396557	-
PluApr	unkonwn		class I-related region	I1	SUPER_30	48663	50207	+
	unkonwn		class I-related region	I2	SUPER_30	56608	58225	+
	unkonwn		class I-related region	TAP2	SUPER_30	62089	65652	-
	unkonwn		class I-related region	TAP1	SUPER_30	67706	69445	-
	unkonwn		class I-related region	I3	SUPER_30	88926	90448	-
	unkonwn			DMB2	SUPER_30	214558	216075	-
	unkonwn			DMB1	SUPER_30	218786	221358	-
	unkonwn			DMB2-D	SUPER_30	219214	221358	-
	unkonwn			DMA	SUPER_30	222484	224516	-
	unkonwn		class II-related region	BRD2	SUPER_30	231764	237815	+
	unkonwn			IIA-p	SUPER_30	240950	244412	+
	unkonwn		class II-related region	IIB	SUPER_30	245725	246671	-
	unkonwn		class II-related region	IIA	SUPER_30	247985	249893	+
	unkonwn			COL11A2	SUPER_30	261362	272814	-
StrHir	scaffold			BRD2	WNMW01000028.1	632	6634	-
	scaffold			DMA	WNMW01000028.1	15029	17357	+
	scaffold			DMB1	WNMW01000028.1	19321	21486	+
	scaffold			DMB2	WNMW01000028.1	19321	20944	+
	scaffold			DMB2-D	WNMW01000028.1	24237	26083	+
	scaffold			IIA	WNMW01000078.1	103542	104537	+
	scaffold			COL11A2	WNMW01000078.1	114032	127374	-
	scaffold			I1	WNMW01000078.1	233179	234833	+
	scaffold			TAP1	WNMW01000078.1	241230	242936	+
	scaffold			TAP2	WNMW01000078.1	244728	248591	+
	scaffold			I2	WNMW01000078.1	252404	254050	-
	scaffold			TAP1-D	WNMW01000078.1	381510	383246	+
	scaffold			TAP2-D	WNMW01000078.1	384700	388696	+
	scaffold			I3	WNMW01000078.1	393174	394694	-
StrTur	Chromosome	# 30		BRD2	LR594580.1	189952	208538	+
	Chromosome	# 17		COL11A2	LR594569.1	7666213	7700552	+
MerNub	Chromosome	# 22		COL11A2	CM020401.1	3584701	3622645	-
	scaffold			I1	WNMU01000075.1	37658	38941	+
	scaffold			I2	WNMU01000075.1	44847	46129	+
	scaffold			IIB1	WNMU01000075.1	54503	55347	-
	scaffold			IIA1	WNMU01000075.1	56612	57626	+
	scaffold			TAP2	WNMU01000075.1	58759	62784	-
	scaffold			TAP1	WNMU01000075.1	64760	67372	-
	scaffold			I3	WNMU01000075.1	73031	74314	-
	scaffold			TAPBL	WNMU01000075.1	125812	130504	+
	scaffold			I4	WNMU01000075.1	153266	154401	+
	scaffold			I5	WNMU01000075.1	157263	158434	+
	scaffold			I6	WNMU01000075.1	161122	162293	+
	scaffold			I7	WNMU01000075.1	170660	171936	+
	scaffold			I8	WNMU01000075.1	184408	185406	+
	scaffold			I9	WNMU01000075.1	195597	196874	+
	scaffold			I10	WNMU01000075.1	206815	208072	-
	scaffold			I11	WNMU01000095.1	9602	10771	-
	scaffold			I12	WNMU01000095.1	13631	14812	-
	scaffold			I13	WNMU01000095.1	17703	18882	-
	scaffold			I14	WNMU01000095.1	21763	22944	-
	scaffold			I15	WNMU01000095.1	25817	26987	-
	scaffold			DMB2	WNMU01000095.1	61346	61346	+
	scaffold			DMB1	WNMU01000095.1	63334	66006	-
	scaffold			DMA	WNMU01000095.1	67539	69477	-
	scaffold			BRD2	WNMU01000095.1	74920	81203	+
	scaffold			IIA2	WNMU01000095.1	82950	83964	-
	scaffold			IIB2	WNMU01000095.1	85166	86113	+
	scaffold			IIB3	WNMU01000095.1	88198	89144	-
	scaffold			IIA3	WNMU01000095.1	90523	91535	+
	scaffold			I16	WNMU01000100.1	46950	48130	+
	scaffold			I17	WNMU01000100.1	50779	51947	+
CucCan	unkonwn			I1	scaffold_14|arrow	20247445	20248884	-
	unkonwn		class II-related region	IIB1	scaffold_42|arrow	1131995	1133655	+
	unkonwn		class II-related region	IIB2	scaffold_42|arrow	1135823	1137334	+
	unkonwn		class II-related region	IIB3	scaffold_42|arrow	1140497	1142287	+
	unkonwn		class II-related region	IIB4	scaffold_42|arrow	1144810	1146603	+
	unkonwn		class II-related region	IIB5	scaffold_42|arrow	1149534	1151342	+
	unkonwn			DMB2	scaffold_42|arrow	1159897	1161650	-
	unkonwn			DMB1	scaffold_42|arrow	1160063	1161650	-
	unkonwn			DMA	scaffold_42|arrow	1166213	1164594	-
	unkonwn		class II-related region	BRD2	scaffold_42|arrow	1172492	1181237	+
	unkonwn		class II-related region	IIB6	scaffold_42|arrow	1186339	1188450	-
	unkonwn		class II-related region	IIA	scaffold_42|arrow	1192795	1196964	+
	unkonwn			COL11A2	scaffold_42|arrow	1208344	1255448	-
	unkonwn		class I-related region	I2	scaffold_42|arrow	1533166	1535069	+
	unkonwn		class I-related region	TAP1	scaffold_42|arrow	1793814	1796161	+
FalNau	unkonwn			DMB2	SUPER_22_unloc_1	20510	23548	-
	unkonwn			DMB1	SUPER_22_unloc_1	20734	23548	-
	unkonwn			DMA	SUPER_22_unloc_1	29312	30565	-
	unkonwn			BRD2	SUPER_22_unloc_1	37295	45093	+
	unkonwn			IIB	SUPER_22_unloc_1	47991	48957	-
	unkonwn			IIA	SUPER_22_unloc_1	51697	55337	-
	unkonwn			COL11A2	SUPER_9	7909079	7949486	-
FalRus	Chromosome	# 9		BRD2	CM026674.1	48272031	48288194	+
	Chromosome	# 10		COL11A2	CM026674.1	47750663	47791027	-
TauEry	Chromosome	# 22		BRD2	CM019987.1	8526629	8542887	-
	Chromosome	# 23		COL11A2	CM019987.1	9012398	9052846	-
	scaffold			I1	WOXW01000083.1	24189	25759	-
	scaffold			DMB1	WOXW01000083.1	31263	33591	-
	scaffold			DMB2	WOXW01000083.1	31263	33591	-
	scaffold			DMB1-D	WOXW01000083.1	36813	39535	-
	scaffold			DMA	WOXW01000083.1	42317	45443	-
	scaffold			I2	WOXW01000083.1	62679	64236	+
	scaffold			TAP2	WOXW01000083.1	67701	71054	-
	scaffold			TAP1	WOXW01000083.1	72968	73918	-
	scaffold			I3	WOXW01000083.1	85753	87098	-
	scaffold			I4	WOXW01000083.1	100361	101726	-
CicMag	scaffold			IIA1	scaffold_105_ctg1	7444	9358	-
	scaffold			IIB1	scaffold_105_ctg1	10315	11314	+
	scaffold			IIA2	scaffold_105_ctg1	12825	14738	-
	scaffold			IIB2	scaffold_105_ctg1	15695	16696	+
	scaffold			BRD2	scaffold_105_ctg1	19801	25914	-
	scaffold			TAP2	scaffold_61_ctg1	418	4260	+
	scaffold			I1-p	scaffold_61_ctg1	6897	7522	-
	scaffold			I2-p	scaffold_61_ctg1	28967	29592	-
	scaffold			I3-p	scaffold_61_ctg1	50928	51553	-
	scaffold			COL11A2	SUPER_17	9120224	9155574	+
PhoRub	scaffold			I7	WNMK01000052.1	66310	67980	+
	scaffold			I8	WNMK01000052.1	96006	97674	-
	scaffold			I9	WNMK01000052.1	127570	129149	+
	scaffold			I1	WNMK01000052.1	152415	154065	+
	scaffold			TAP1	WNMK01000052.1	159547	160981	+
	scaffold			I2	WNMK01000052.1	198359	200005	+
	scaffold			TAP1	WNMK01000052.1	205403	206613	+
	scaffold			I3	WNMK01000052.1	216168	217835	+
	scaffold			TAP2	WNMK01000052.1	221382	310416	-
	scaffold			I4	WNMK01000052.1	228082	229746	+
	scaffold			TAP1	WNMK01000052.1	235729	311601	+
	scaffold			I5	WNMK01000052.1	240290	241947	+
	scaffold			I6	WNMK01000052.1	251121	252765	-
	scaffold			COL11A2	WNMK01000058.1	43	7757	+
	scaffold			IIA1	WNMK01000058.1	17455	19371	-
	scaffold			IIB1	WNMK01000058.1	20667	21676	+
	scaffold			IIA2	WNMK01000058.1	23297	25187	-
	scaffold			IIB2	WNMK01000058.1	26149	27147	+
	scaffold			BRD2	WNMK01000058.1	31682	37780	-
	scaffold			DMA	WNMK01000058.1	47313	49755	+
	scaffold			DMB1	WNMK01000058.1	50834	52493	+
	scaffold			DMB2	WNMK01000058.1	55347	57175	+
	scaffold			TAP1-D	WNMK01000058.1	74766	76312	+
	scaffold			TAP2-D	WNMK01000058.1	77626	81239	+
PicPub	Chromosome	# 29		COL11A2	CM026022.1	3164219	3213791	+
	Chromosome	# 39		IIB1	CM026032.1	44550	46221	+
	Chromosome	# 39		IIB2	CM026032.1	50244	51910	+
	Chromosome	# 39		IIB3	CM026032.1	56268	57938	+
	Chromosome	# 39		DMB1	CM026032.1	263650	264491	-
	Chromosome	# 39		DMB1	CM026032.1	265581	266509	-
	Chromosome	# 39		DMA	CM026032.1	268970	269703	-
	Chromosome	# 39		BRD2	CM026032.1	273336	284238	+
	Chromosome	# 39		IIB4	CM026032.1	3946695	3948476	+
	Chromosome	# 39		I1	CM026032.1	4176841	4178421	+
	Chromosome	# 42		IIB5	CM026035.1	362107	363312	-
	Chromosome	# 42		IIB6	CM026035.1	1312049	1313033	-
	Chromosome	# Z		IIA	CM026039.1	1314198	1315962	+
	Chromosome	# Z		IIB7	CM026039.1	1323442	1322607	-
	scaffold			I2	JACNMV010000005.1	3926	5507	-
	scaffold			I3	JACNMV010000005.1	14400	15981	-
	scaffold			I4	JACNMV010000005.1	21333	22893	-
	scaffold			I5	JACNMV010000005.1	26292	27801	+
PogPus	Chromosome	# 35		COL11A2	CM026810.1	11108793	11163366	+
	Chromosome	# 35		BRD2	CM026810.1	11793177	11814276	+
	Chromosome	# W		IIB1	CM026820.1	10938852	10940614	+
	scaffold			IIB2	JADCQK010000035.1	30214	32014	+
	scaffold			IIB3	JADCQK010000035.1	34158	35225	+
	scaffold			IIB4	JADCQK010000035.1	42113	43644	-
	scaffold			I	JADCQK010000218.1	566332	568457	+
MelUnd	Chromosome	# 11		COL11A2	CM022642.1	856790	892619	+
	Chromosome	# 28		I1	CM022659.1	269973	271483	-
	Chromosome	# 28		I2	JAAVWG010000668.1	120197	121706	-
	Chromosome	# 28		I3	JAAVWG010000668.1	126350	127871	-
	Chromosome	# 28		DMB1	JAAVWG010000668.1	137514	139142	+
	Chromosome	# 28		DMA	JAAVWG010000668.1	140332	141046	+
	Chromosome	# 28		BRD2	JAAVWG010000668.1	144139	151176	+
	Chromosome	# 28		IIB	JAAVWG010000668.1	152718	154038	-
	Chromosome	# 28		IIA	JAAVWG010000668.1	155403	156569	+
StrHab	Chromosome	# 15		BRD2	NC_044291.2	476668	490172	-
	scaffold			IIB	NW_022651056.1	50598	52049	-
	scaffold			IIA	NW_022651056.1	54044	56048	-
	scaffold			I1	NW_022651111.1	121752	123208	-
	scaffold			I2	NW_022651111.1	127567	128968	+
	scaffold			TAP1	NW_022651111.1	138284	139656	+
	scaffold			TAP2	NW_022651111.1	141242	149816	+
	scaffold			COL11A2	NW_022651115.1	25592	37503	+
PteGut	Chromosome	# 26		COL11A2	CM020166.1	8709974	8748223	+
	scaffold		class II-related region	IIB1	WNNE01000087.1	11611	12542	-
	scaffold		class II-related region	IIA1	WNNE01000087.1	13530	14910	+
	scaffold		class II-related region	IIB2	WNNE01000087.1	16358	17293	-
	scaffold		class II-related region	IIA2	WNNE01000087.1	18558	20433	+
	scaffold		class II-related region	IIA3	WNNE01000087.1	28259	30121	-
	scaffold		class II-related region	IIB3	WNNE01000087.1	31655	31655	+
	scaffold		class II-related region	BRD2	WNNE01000087.1	38478	44362	-
	scaffold			DMA	WNNE01000087.1	54251	56989	+
	scaffold			DMB1	WNNE01000087.1	59221	61309	-
	scaffold			DMB2	WNNE01000087.1	65286	68116	+
	scaffold		class I-related region	I1	WNNE01000087.1	70878	71893	+
	scaffold		class I-related region	I2	WNNE01000087.1	89698	91339	+
	scaffold		class I-related region	I3	WNNE01000087.1	111294	112935	+
	scaffold		class I-related region	TAP2	WNNE01000087.1	123227	126822	-
	scaffold		class I-related region	TAP1	WNNE01000087.1	128490	130810	-
	scaffold		class I-related region	I4	WNNE01000087.1	140099	141734	-
	scaffold		class I-related region	I5	WNNE01000087.1	218911	220553	+
AytFul	Chromosome	# 33		COL11A2	NC_045591.1	16870	26734	+
	Chromosome	# 33	class II-related region	IIA	NC_045591.1	31324	33183	-
	Chromosome	# 33	class II-related region	IIB1	NC_045591.1	34267	35194	+
	Chromosome	# 33	class II-related region	IIB2	NC_045591.1	38633	39550	-
	Chromosome	# 33	class II-related region	BRD2	NC_045591.1	48229	53846	-
	Chromosome	# 33		DMA	NC_045591.1	56511	60733	+
	Chromosome	# 33		DMB	NC_045591.1	60791	64944	+
	Chromosome	# 33	class I-related region	I1	NC_045591.1	612587	614147	+
	Chromosome	# 33	class I-related region	I2	NC_045591.1	618866	620436	+
	Chromosome	# 33	class I-related region	I3	NC_045591.1	625490	627050	+
	Chromosome	# 33	class I-related region	I4	NC_045591.1	631778	633347	+
	Chromosome	# 33	class I-related region	I5	NC_045591.1	638525	640091	+
	Chromosome	# 33	class I-related region	I6	NC_045591.1	642767	644315	+
	Chromosome	# 33	class I-related region	I7	NC_045591.1	648147	649707	+
	Chromosome	# 33	class I-related region	I8	NC_045591.1	653338	654871	+
	Chromosome	# 33	class I-related region	I9	NC_045591.1	658689	660249	+
	Chromosome	# 33	class I-related region	I10	NC_045591.1	663940	665505	+
	Chromosome	# 33	class I-related region	I11	NC_045591.1	669253	670823	+
	Chromosome	# 33	class I-related region	TAP2	NC_045591.1	672966	676104	-
	Chromosome	# 33	class I-related region	TAP1	NC_045591.1	677079	682724	+
CygOlo	na		class II-related region	IIA	WNMI01000030.1	127897	129386	-
	na			DMA	WNMI01000030.1	153484	154303	+
	na		class II-related region	BRD2	WNMI01000030.1	141928	147853	-
	na			DMB1	WNMI01000030.1	154954	156931	+
	na			DMB2	WNMI01000030.1	173595	174952	+
	na		class II-related region	II-1	WNMI01000030.1	130534	131477	+
	na		class II-related region	II-2	WNMI01000030.1	137890	138833	-
	na		class I-related region	I-1	WNMI01000030.1	242564	244141	-
	na		class I-related region	I-2	WNMI01000030.1	250513	251740	-
	na		class I-related region	TAP1	WNMI01000030.1	234455	236508	+
	na		class I-related region	TAP2	WNMI01000030.1	237444	240487	+
	na			COL11A2	WNMI01000030.1	111620	122029	+
CalAnn	Chromosome	# 17		BRD2	CM012129.1	9087531	9100939	-
	Chromosome	# 17		COL11A2	CM012129.1	9518356	9548838	+
CygAtr	scaffold			I1	NW_023336759.1	565331	566561	+
	scaffold			I2	NW_023336759.1	575313	576889	+
	scaffold			TAP2	NW_023336759.1	578826	582433	-
	scaffold			TAP1	NW_023336759.1	582778	589123	+
	scaffold			DMB2	NW_023336759.1	654668	657805	-
	scaffold			DMB1	NW_023336759.1	658476	660501	-
	scaffold			DMA	NW_023336759.1	660811	663766	-
	scaffold			COL11A2	NW_023336912.1	11166	21582
	scaffold			IIA	NW_023336912.1	27228	28928	-
	scaffold			IIB1	NW_023336912.1	30101	31045	+
	scaffold			IIB2	NW_023336912.1	37240	38185	-
	scaffold			BRD2	NW_023336912.1	41157	46138	-
AnsCyg	scaffold			I1	WTSS01000350.1	44292	45521	+
	scaffold			I2	WTSS01000350.1	50043	51622	+
	scaffold			I3	WTSS01000350.1	57463	59270	+
	scaffold			I4	WTSS01000350.1	66371	67946	+
	scaffold			TAP2	WTSS01000350.1	73074	70030	+
	scaffold			TAP1	WTSS01000350.1	74250	75846	-
	scaffold			DMB1	WTSS01000350.1	156008	157287	-
	scaffold			DMB2	WTSS01000350.1	237412	238678	-
	scaffold			DMB3	WTSS01000350.1	253621	254851	-
	scaffold			BRD2	WTSS01000501.1	8094829	8113418	-
	scaffold			TAP1	WTSS01000810.1	28226	29964	+
	scaffold			TAP2	WTSS01000810.1	31153	34196	+
	scaffold			I5	WTSS01000810.1	36278	37848	-
	scaffold			I6	WTSS01000810.1	42833	44062	-
	scaffold			IIB1	WTSS01000979.1	4117	5060	-
	scaffold			IIA	WTSS01000979.1	6219	7725	+
	scaffold			COL11A2	WTSS01000979.1	13562	23914
	scaffold			IIB2	WTSS01000981.1	3816	4652	+
AnaPla-1				IIA	blast-g	hit=0
	Chromosome	# 17		AnaPla-1-I1	NC_051788.1	1034329	1035903	+
	Chromosome	# 17		AnaPla-1-I2	NC_051788.1	1041845	1043415	+
	Chromosome	# 17		TAP2-B	NC_051788.1	1045466	1048510	-
	Chromosome	# 17		TAP1-B	NC_051788.1	1049445	1051500	-
	Chromosome	# 17		DMB1	NC_051788.1	1228168	1229266	-
	Chromosome	# 17		DMB3	NC_051788.1	1349550	1350794	-
	Chromosome	# 17		DMB2	NC_051788.1	1350518	1349798	-
	Chromosome	# 17		DMA	NC_051788.1	1354590	1355487	-
	Chromosome	# 17		BRD2	NC_051788.1	1362035	1367573	+
	Chromosome	# 17		AnaPla-1-IIB1	NC_051788.1	1371480	1372402	+
	Chromosome	# 17		AnaPla-1-IIB2	NC_051788.1	1376213	1377134	+
	Chromosome	# 17		AnaPla-1-IIB3	NC_051788.1	1380944	1381853	+
	Chromosome	# 17		AnaPla-1-IIB4	NC_051788.1	1385496	1386411	+
	Chromosome	# 17		AnaPla-1-IIB5	NC_051788.1	1390214	1391138	+
	Chromosome	# 17		AnaPla-1-IIB6	NC_051788.1	1395870	1396795	+
	Chromosome	# 17		AnaPla-1-IIB7	NC_051788.1	1401433	1402342	+
	scaffold			AnaPla-1-I3	NW_024010101.1	2774	4340	+
	scaffold			TAP2	NW_024010101.1	6331	9343	-
	scaffold			TAP1	NW_024010101.1	10277	12278	-
AnaPla-2	Chromosome	# 17	class I-related region	TAP1	LS423627.1	198183	199536	+
	Chromosome	# 17	class I-related region	TAP2	LS423627.1	200969	204013	+
	Chromosome	# 17	class I-related region	AnaPla-2-partical I	LS423627.1	206056	205820
	Chromosome	# 17		DMB1	LS423627.1	267824	269386	+
	Chromosome	# 17		DMA	LS423627.1	271671	272138	+
	Chromosome	# 17		BRD2	LS423627.1	280682	283718	+
	Chromosome	# 17		DMB2	LS423627.1	332652	332652	-
	Chromosome	Unknown	class I-related region	AnaPla-2-partical I	LS423642.1	206056	205820
	Chromosome	Unknown	class II-related region	AnaPla-2-partical IIB	LS423642.1	24290788	24291069
	Chromosome	Unknown	class II-related region	AnaPla-2-IIB	LS423642.1	24293964	24294905	-
	Chromosome	Unknown	class II-related region	AnaPla-2-IIA	LS423642.1	24296113	24297518	+
	Chromosome	Unknown		COL11A2	LS423642.1	24302362	24312745
CorHaw	Contig		class I-related region	I4	QORP01000031.1	150654	151950	+
	Contig			COL11A2	QORP01000043.1	1997268	2028809	-
	Contig			TAP2	QORP01000082.1	386975	391190	+
	Contig			Passer-Tap1	QORP01000082.1	393152	399835	+
	Contig		class I-related region	I2	QORP01000306.1	233003	234225	-
	Contig		class I-related region	I3	QORP01000306.1	330829	332125	-
	Contig		class II-related region	IIB10	QORP01000434.1	17130	19495	-
	Contig			DMA	QORP01000434.1	89633	89870	+
	Contig		class II-related region	IIB1	QORP01000440.1	76843	84787	+
	Contig		class II-related region	IIA-exon2	QORP01000447.1	49364	49208	-
	Contig		class II-related region	IIA-exon3	QORP01000447.1	47936	47657	-
	Contig		class II-related region	IIA-exon4	QORP01000447.1	41475	41374	-
	Contig		class II-related region	IIB2	QORP01000447.1	54527	56359	-
	Contig		class II-related region	IIB3	QORP01000447.1	69123	70954	-
	Contig		class II-related region	IIB4	QORP01000447.1	80562	82406	-
	Contig		class I-related region	I5	QORP01000525.1	182539	191292	-
	Contig		class II-related region	IIB5	QORP01000564.1	4178	5955	-
	Contig		class II-related region	IIB6	QORP01000564.1	15516	17345	+
	Contig		class II-related region	IIB7	QORP01000564.1	26444	28270	+
	Contig		class I-related region	I1	QORP01000626.1	33876	35250	-
	Contig		class II-related region	IIB8	QORP01002133.1	9240	11071	+
	Contig		class II-related region	IIB11	QORP01002133.1	29763	31592	+
	Contig		class II-related region	IIB9	QORP01002133.1	46145	47931	+
Eopaus	scaffold		class II-related region	IIB1-pseudo	QKXG01000023.1	42357	44068	+
	scaffold		class II-related region	IIB2	QKXG01000023.1	108419	110837	+
	scaffold		class II-related region	IIB27	QKXG01000361.1	61545	63347	-
	scaffold		class II-related region	IIB3	QKXG01000361.1	208050	209882	+
	scaffold		class II-related region	IIB4	QKXG01000383.1	100727	103019	+
	scaffold		class II-related region	IIB28	QKXG01000383.1	144819	146599	-
	scaffold			Passer-Tap1	QKXG01000391.1	1110	5307	+
	scaffold		class II-related region	IIB5	QKXG01000397.1	42186	44008	+
	scaffold		class II-related region	IIB6	QKXG01001194.1	16948	18909	+
	scaffold		class II-related region	IIB29	QKXG01001210.1	46787	48591	-
	scaffold		class II-related region	IIB7	QKXG01001210.1	81196	82924	+
	scaffold		class II-related region	IIB30	QKXG01001406.1	40875	42657	-
	scaffold		class I-related region	I1	QKXG01001406.1	60382	61772	+
	scaffold		class I-related region	I2	QKXG01001427.1	48250	49421	+
	scaffold		class II-related region	IIB38	QKXG01001492.1	93013	94742	-
	scaffold		class II-related region	IIB31-pseudo	QKXG01001891.1	212516	214219	-
	scaffold		class II-related region	IIB8	QKXG01001891.1	248573	250307	+
	scaffold		class II-related region	IIB9	QKXG01002127.1	18875	20739	+
	scaffold		class II-related region	IIB10	QKXG01002127.1	22663	24505	+
	scaffold		class II-related region	IIB11	QKXG01002132.1	198567	200998	+
	scaffold		class I-related region	I6	QKXG01002132.1	217289	218596	-
	scaffold		class II-related region	IIA-exon2	QKXG01002720.1	5160	5008	-
	scaffold		class II-related region	IIA-exon3	QKXG01002720.1	701	425	-
	scaffold		class II-related region	IIB34	QKXG01006029.1	203	1649	+
	scaffold		class II-related region	IIB12	QKXG01006791.1	1981	3849	+
	scaffold		class II-related region	IIB13	QKXG01007144.1	688	2607	+
	scaffold		class II-related region	IIB14-pseudo	QKXG01007357.1	9907	11716	+
	scaffold		class II-related region	IIB35	QKXG01008005.1	518	2371	+
	scaffold			TAP2	QKXG01008161.1	3557	8151	+
	scaffold		class II-related region	IIB15	QKXG01008672.1	613	2322	+
	scaffold		class II-related region	IIB32-pseudo	QKXG01008760.1	4085	5963	-
	scaffold		class I-related region	I3-pseudo	QKXG01009000.1	30010	33664	-
	scaffold		class II-related region	IIB36	QKXG01009033.1	431	2325	+
	scaffold		class II-related region	IIB16	QKXG01009266.1	17847	19680	+
	scaffold		class II-related region	IIB17-pseudo	QKXG01009420.1	9371	11265	+
	scaffold		class II-related region	IIB33-pseudo	QKXG01009832.1	19148	20854	-
	scaffold			COL11A2	QKXG01010074.1	5129	33197	-
	scaffold		class II-related region	IIB18-pseudo	QKXG01010321.1	25903	27702	+
	scaffold		class II-related region	IIB19	QKXG01010361.1	8534	10252	+
	scaffold		class II-related region	IIB37	QKXG01010488.1	88132	89934	+
	scaffold		class II-related region	IIB20	QKXG01010661.1	12708	14549	+
	scaffold		class II-related region	IIB21-pseudo	QKXG01010675.1	67750	69678	+
	scaffold		class I-related region	I4	QKXG01010675.1	86888	88303	-
	scaffold			Passer-Tap1	QKXG01018237.1	333	2258	+
	scaffold		class II-related region	IIB22	QKXG01019296.1	7929	9750	+
	scaffold		class I-related region	I5-pseudo	QKXG01019657.1	1661	3584	-
	scaffold		class II-related region	IIB23	QKXG01020390.1	23127	24835	+
	scaffold		class II-related region	IIB24-pseudo	QKXG01020398.1	6098	7864	+
	scaffold		class II-related region	IIB25	QKXG01020400.1	882	36648	-
	scaffold		class II-related region	IIB39	QKXG01020420.1	44693	46495	-
	scaffold		class II-related region	IIB26	QKXG01020434.1	28249	30088	-
HirRus	scaffold			COL11A2	QRBI01000209.1	2999008	3038723	-
	scaffold		class I-related region	I7	QRBI01000100.1	754277	756293	+
	scaffold		class II-related region	IIB21-pseudo	QRBI01000100.1	381183	716374	+
	scaffold		class II-related region	IIB22	QRBI01000100.1	779910	781614	+
	scaffold		class II-related region	IIB23	QRBI01000100.1	917783	919517	+
	scaffold		class II-related region	IIB24	QRBI01000100.1	956227	986626	+
	scaffold		class II-related region	IIB25	QRBI01000100.1	1167330	1169056	+
	scaffold		class II-related region	IIB26	QRBI01000100.1	1242474	1244223	+
	scaffold		class II-related region	IIB27-pseudo	QRBI01000100.1	1338563	1340292	+
	scaffold		class II-related region	IIB28-pseudo	QRBI01000100.1	1484236	1499118	-
	scaffold		class II-related region	IIB29-pseudo	QRBI01000100.1	1500535	1668841	-
	scaffold		class II-related region	IIB30	QRBI01000100.1	1864179	1865943	-
	scaffold		class II-related region	IIB31	QRBI01000100.1	1928793	1930533	-
	scaffold		class II-related region	IIB32	QRBI01000100.1	2086151	2087885	-
	scaffold		class II-related region	IIB33	QRBI01000100.1	2117427	2119169	-
	scaffold		class II-related region	IIB34	QRBI01000100.1	2172894	2174640	-
	scaffold		class II-related region	IIB35	QRBI01000100.1	2430362	2432074	+
	scaffold		class II-related region	IIB36-pseudo	QRBI01000100.1	2584971	2586700	+
	scaffold		class II-related region	IIB37-pseudo	QRBI01000100.1	2779428	3016162	-
	scaffold		class II-related region	IIB38	QRBI01000100.1	3108404	3110036	+
	scaffold		class II-related region	IIB39	QRBI01000100.1	3265742	3267470	-
	scaffold		class II-related region	IIB40	QRBI01000100.1	3375860	3377597	+
	scaffold		class II-related region	IIB41	QRBI01000100.1	3408459	3460294	-
	scaffold		class II-related region	IIB42	QRBI01000100.1	3686548	3688319	+
	scaffold		class II-related region	IIB43	QRBI01000100.1	3951683	3953410	-
	scaffold		class I-related region	I3-pseudo	QRBI01000110.1	606029	607285	-
	scaffold		class I-related region	I4-pseudo	QRBI01000110.1	1117834	1119591	-
	scaffold		class I-related region	I5	QRBI01000110.1	1493075	1495007	+
	scaffold		class I-related region	I6	QRBI01000110.1	1516760	1518222	+
	scaffold		class I-related region	I10-pseudo	QRBI01000110.1	568301	569557	-
	scaffold		class II-related region	IIB17-pseudo	QRBI01000110.1	545587	547363	-
	scaffold		class II-related region	IIB18-pseudo	QRBI01000110.1	1083338	1084752	+
	scaffold		class II-related region	IIB19	QRBI01000110.1	1388527	1390206	-
	scaffold		class II-related region	IIB20	QRBI01000110.1	1418438	1420184	-
	scaffold		class II-related region	IIB15	QRBI01000157.1	72437	74205	-
	scaffold		class II-related region	IIB16	QRBI01000157.1	319258	321022	-
	scaffold		class I-related region	I11-pseudo	QRBI01000178.1	146752	148806	+
	scaffold		class I-related region	I12-pseudo	QRBI01000178.1	1258603	1260658	+
	scaffold		class I-related region	I9-pseudo	QRBI01000212.1	508300	509614	+
	scaffold		class I-related region	I2	QRBI01000219.1	449644	451658	+
	scaffold		class I-related region	I8	QRBI01000219.1	778035	779677	+
	scaffold		class II-related region	IIB11	QRBI01000219.1	59345	61098	-
	scaffold		class II-related region	IIB12	QRBI01000219.1	160721	162426	+
	scaffold		class II-related region	IIB13	QRBI01000219.1	59345	61102	-
	scaffold		class II-related region	IIB14-pseudo	QRBI01000219.1	414800	426927	-
	scaffold		class I-related region	I1-pseudo	QRBI01000271.1	20304	21611	+
	scaffold		class II-related region	IIB5	QRBI01000304.1	119251	121010	+
	scaffold		class II-related region	IIB6	QRBI01000304.1	278506	280250	+
	scaffold		class II-related region	IIB7	QRBI01000304.1	488412	490087	-
	scaffold		class II-related region	IIB8	QRBI01000304.1	594796	596534	-
	scaffold		class II-related region	IIB9	QRBI01000304.1	651619	653388	-
	scaffold		class II-related region	IIB10	QRBI01000304.1	701437	703040	+
	scaffold		class II-related region	IIB1	QRBI01000314.1	30545	58021	+
	scaffold		class II-related region	IIB2	QRBI01000314.1	92837	94573	-
	scaffold		class II-related region	IIB3	QRBI01000314.1	721488	723227	-
	scaffold		class II-related region	IIB4	QRBI01000314.1	733718	761645	+
	scaffold			Passer-Tap1	QRBI01000333.1	71878	80310	+
	scaffold			TAP2	QRBI01000333.1	65090	68466	-
Manvit	scaffold		class I-related region	I27	NW_020340217.1	189627	190830	-
	scaffold			Passer-Tap1	NW_020340240.1	67835	76215	-
	scaffold			TAP2	NW_020340240.1	82319	85606	+
	scaffold		class II-related region	IIB180	NW_020340297.1	98	1693	-
	scaffold		class II-related region	IIB181	NW_020340297.1	5737	7254	-
	scaffold		class II-related region	IIB182	NW_020340297.1	12408	13925	-
	scaffold		class I-related region	I23	NW_020340303.1	24819	26081	+
	scaffold		class I-related region	I24	NW_020340303.1	47403	48665	+
	scaffold		class I-related region	I25	NW_020340303.1	58714	59976	+
	scaffold		class I-related region	I26	NW_020340303.1	70418	71701	-
	scaffold		class II-related region	IIB179	NW_020340313.1	81747	83562	-
	scaffold		class II-related region	IIB178	NW_020340317.1	5176	6665	-
	scaffold		class II-related region	IIB177	NW_020340337.1	1588	3104	+
	scaffold		class II-related region	IIB170-pseudo	NW_020340453.1	215	1719	+
	scaffold		class I-related region	I20	NW_020340453.1	22195	23510	+
	scaffold		class II-related region	IIB171	NW_020340453.1	31330	33181	-
	scaffold		class II-related region	IIB172	NW_020340453.1	35742	36874	-
	scaffold		class I-related region	I21	NW_020340453.1	39478	40793	+
	scaffold		class II-related region	IIB173	NW_020340453.1	48589	50424	-
	scaffold		class II-related region	IIB174	NW_020340453.1	52963	54064	-
	scaffold		class I-related region	I22	NW_020340453.1	67832	69147	+
	scaffold		class II-related region	IIB175	NW_020340453.1	76603	78454	-
	scaffold		class II-related region	IIB176	NW_020340453.1	80990	82090	-
	scaffold		class II-related region	IIB165	NW_020340463.1	1685	3193	-
	scaffold		class II-related region	IIB166	NW_020340463.1	8082	9590	-
	scaffold		class II-related region	IIB167	NW_020340463.1	13229	15085	-
	scaffold		class II-related region	IIB168	NW_020340463.1	17344	18848	-
	scaffold		class II-related region	IIB169	NW_020340463.1	21204	22721	-
	scaffold		class I-related region	I19	NW_020340479.1	1129	2393	+
	scaffold		class II-related region	IIB163	NW_020340479.1	46507	48363	-
	scaffold		class II-related region	IIB164	NW_020340479.1	66784	68640	-
	scaffold		class II-related region	IIB162	NW_020340511.1	2754	4270	+
	scaffold		class II-related region	IIB156	NW_020340538.1	18029	19595	-
	scaffold		class I-related region	I17	NW_020340538.1	23808	25072	-
	scaffold		class II-related region	IIB157	NW_020340538.1	29786	31352	-
	scaffold		class II-related region	IIB158	NW_020340538.1	48448	49964	-
	scaffold		class I-related region	I18	NW_020340538.1	54177	55441	-
	scaffold		class II-related region	IIB159	NW_020340538.1	73332	74881	+
	scaffold		class II-related region	IIB160	NW_020340538.1	76945	78415	+
	scaffold		class II-related region	IIB161	NW_020340538.1	80442	81950	+
	scaffold		class II-related region	IIB155	NW_020340549.1	5871	7453	-
	scaffold		class II-related region	IIB154	NW_020340557.1	2221	3749	-
	scaffold			COL11A2	NW_020340587.1	3209844	3247334	-
	scaffold		class II-related region	IIA-exon2	NW_020340597.1	5983	6139	+
	scaffold		class II-related region	IIB153	NW_020340643.1	6193	7952	-
	scaffold		class II-related region	IIB151	NW_020340661.1	1996	3545	+
	scaffold		class II-related region	IIB152	NW_020340661.1	5568	7055	+
	scaffold		class II-related region	IIB150	NW_020340669.1	2595	4161	-
	scaffold		class II-related region	IIB149	NW_020340751.1	1759	3307	-
	scaffold		class II-related region	IIB147	NW_020340783.1	22877	24403	-
	scaffold		class II-related region	IIB148	NW_020340783.1	43566	45092	-
	scaffold		class II-related region	IIB146	NW_020340802.1	46882115	46883880	-
	scaffold		class II-related region	IIB145	NW_020340815.1	31640	33421	-
	scaffold		class I-related region	I16	NW_020340877.1	3002	4252	-
	scaffold		class II-related region	IIB143-pseudo	NW_020340916.1	6777	8307	-
	scaffold		class II-related region	IIB144	NW_020340916.1	18403	19999	-
	scaffold		class II-related region	IIB139	NW_020340944.1	817	2595	+
	scaffold		class II-related region	IIB140	NW_020340944.1	14811	16360	+
	scaffold		class II-related region	IIB141	NW_020340944.1	18423	19909	+
	scaffold		class II-related region	IIB142	NW_020340944.1	23101	24880	+
	scaffold		class I-related region	I15	NW_020340950.1	14647	15897	+
	scaffold		class II-related region	IIB138	NW_020340966.1	10865	12461	-
	scaffold		class II-related region	IIB137	NW_020341242.1	1	1512	-
	scaffold		class II-related region	IIB136	NW_020341323.1	8156	9672	+
	scaffold		class II-related region	IIB135	NW_020341353.1	7864	9620	-
	scaffold		class II-related region	IIB134	NW_020341360.1	202	1759	+
	scaffold		class II-related region	IIB133	NW_020341452.1	2209	3725	+
	scaffold		class II-related region	IIB132-pseudo	NW_020341584.1	9969	11499	-
	scaffold		class II-related region	IIB131	NW_020341669.1	16215	18069	+
	scaffold		class II-related region	IIB130	NW_020341720.1	876	2428	-
	scaffold		class II-related region	IIB128	NW_020341722.1	3931	5497	+
	scaffold		class II-related region	IIB129	NW_020341722.1	18941	20755	-
	scaffold		class II-related region	IIB127	NW_020341779.1	395	1996	+
	scaffold		class II-related region	IIB126	NW_020341781.1	1897	3385	-
	scaffold		class II-related region	IIB125	NW_020341802.1	108	1704	+
	scaffold		class II-related region	IIB124	NW_020342002.1	2746	4262	-
	scaffold		class II-related region	IIB123	NW_020342180.1	5772	7269	+
	scaffold		class I-related region	I14	NW_020342247.1	6183	7443	-
	scaffold		class II-related region	IIB122	NW_020342282.1	226	1733	+
	scaffold		class II-related region	IIB121	NW_020342363.1	3699	4800	-
	scaffold		class II-related region	IIB120	NW_020342465.1	7260	8856	+
	scaffold		class II-related region	IIB119	NW_020342488.1	14027	15623	-
	scaffold		class II-related region	IIB118	NW_020342728.1	1165	2653	-
	scaffold		class II-related region	IIB117	NW_020342782.1	4612	6119	+
	scaffold		class I-related region	I13	NW_020342800.1	108	1372	+
	scaffold		class II-related region	IIB116	NW_020342828.1	448	2226	+
	scaffold		class II-related region	IIB115	NW_020342894.1	562	2416	-
	scaffold		class II-related region	IIB114	NW_020343191.1	3993	5509	+
	scaffold		class II-related region	IIB113	NW_020343307.1	14076	15831	+
	scaffold		class II-related region	IIB112	NW_020343460.1	8820	10338	+
	scaffold		class II-related region	IIB110	NW_020343530.1	45728	47244	+
	scaffold		class II-related region	IIB111	NW_020343530.1	50448	52044	+
	scaffold		class II-related region	IIB109	NW_020343536.1	5515	7270	+
	scaffold		class I-related region	I12	NW_020343587.1	90	1340	+
	scaffold		class II-related region	IIB108	NW_020343732.1	1232	3006	+
	scaffold		class II-related region	IIB107	NW_020343745.1	2189	3785	-
	scaffold		class II-related region	IIB106	NW_020343778.1	681	2487	-
	scaffold		class II-related region	IIB105	NW_020343947.1	7565	9081	+
	scaffold		class II-related region	IIB104	NW_020344048.1	423	2277	+
	scaffold		class II-related region	IIB103	NW_020344182.1	117	1629	-
	scaffold		class II-related region	IIA-exon2	NW_020344217.1	248	92	-
	scaffold		class II-related region	IIB102	NW_020344269.1	10349	12204	-
	scaffold		class II-related region	IIB101	NW_020344307.1	1593	3078	-
	scaffold		class II-related region	IIB100	NW_020344359.1	444	2010	+
	scaffold		class II-related region	IIB99	NW_020344507.1	19897	21414	-
	scaffold		class II-related region	IIB98	NW_020344567.1	4607	6133	-
	scaffold		class II-related region	IIB97	NW_020344818.1	14497	16093	+
	scaffold		class II-related region	IIB96-pseudo	NW_020344967.1	111	1667	+
	scaffold		class II-related region	IIB95	NW_020345032.1	11923	13519	+
	scaffold		class II-related region	IIB94	NW_020345181.1	1598	3084	-
	scaffold		class II-related region	IIB92	NW_020345221.1	2895	4411	+
	scaffold		class II-related region	IIB93	NW_020345221.1	7644	9423	+
	scaffold		class II-related region	IIB91	NW_020345322.1	6147	7991	-
	scaffold		class II-related region	IIB90	NW_020345364.1	633	2477	+
	scaffold		class II-related region	IIB88	NW_020345404.1	2044	3596	+
	scaffold		class II-related region	IIB89	NW_020345404.1	5850	7559	+
	scaffold		class II-related region	IIB87	NW_020345616.1	4513	6410	-
	scaffold		class II-related region	IIB86	NW_020345639.1	4812	6666	-
	scaffold		class II-related region	IIB83	NW_020345889.1	2292	4100	+
	scaffold		class II-related region	IIB84	NW_020345889.1	19425	20926	-
	scaffold		class II-related region	IIB85	NW_020345889.1	28806	30372	-
	scaffold		class I-related region	I11	NW_020345911.1	10313	11484	+
	scaffold		class II-related region	IIB81	NW_020345947.1	3541	5029	-
	scaffold		class II-related region	IIB82	NW_020345947.1	7066	8615	-
	scaffold		class II-related region	IIB79	NW_020345956.1	990	2491	-
	scaffold		class II-related region	IIB80	NW_020345956.1	13358	15137	-
	scaffold		class II-related region	IIB78	NW_020346011.1	1244	2840	-
	scaffold		class II-related region	IIB77	NW_020346012.1	4551	6068	-
	scaffold		class II-related region	IIB76	NW_020346105.1	3360	5214	-
	scaffold		class II-related region	IIB75	NW_020346304.1	9276	11131	+
	scaffold		class II-related region	IIB74	NW_020346335.1	773	2380	-
	scaffold		class II-related region	IIB73	NW_020346382.1	58	1822	-
	scaffold		class II-related region	IIB72	NW_020346431.1	510	1995	-
	scaffold		class I-related region	I10	NW_020347066.1	10559	11763	+
	scaffold		class I-related region	I9	NW_020347073.1	520	1770	-
	scaffold		class II-related region	IIB71	NW_020347343.1	6219	7815	-
	scaffold		class II-related region	IIB70-pseudo	NW_020347487.1	5215	6781	+
	scaffold		class II-related region	IIB69	NW_020347514.1	3333	4929	-
	scaffold		class II-related region	IIB68	NW_020347541.1	5167	7022	-
	scaffold		class II-related region	IIB67	NW_020347867.1	7484	9036	+
	scaffold		class II-related region	IIB66	NW_020347977.1	10	1864	-
	scaffold		class II-related region	IIB65	NW_020348029.1	2386	3903	-
	scaffold		class II-related region	IIB63	NW_020348131.1	1890	3439	-
	scaffold		class II-related region	IIB64	NW_020348131.1	5520	7005	-
	scaffold		class II-related region	IIB61	NW_020348328.1	554	2070	+
	scaffold		class II-related region	IIB62	NW_020348328.1	5306	6902	+
	scaffold		class II-related region	IIB60	NW_020348414.1	4911	6427	-
	scaffold		class II-related region	IIB58	NW_020348453.1	5340	7119	-
	scaffold		class II-related region	IIB59	NW_020348453.1	10368	11884	-
	scaffold		class II-related region	IIB57	NW_020348527.1	1896	3120	-
	scaffold		class II-related region	IIB55	NW_020348640.1	22262	23778	+
	scaffold		class II-related region	IIB56	NW_020348640.1	27000	28596	+
	scaffold		class II-related region	IIB54	NW_020348667.1	4023	5543	-
	scaffold		class II-related region	IIB53	NW_020348912.1	5501	7000	-
	scaffold		class II-related region	IIB52	NW_020349098.1	3519	5032	-
	scaffold		class II-related region	IIB51	NW_020349253.1	2617	4213	+
	scaffold		class II-related region	IIB50	NW_020349300.1	4010	5864	-
	scaffold		class II-related region	IIB49	NW_020349504.1	14816	16412	+
	scaffold		class II-related region	IIB48	NW_020349583.1	204	2060	-
	scaffold		class II-related region	IIB47	NW_020349625.1	2144	3840	+
	scaffold		class II-related region	IIB46	NW_020349807.1	2197	3706	+
	scaffold		class II-related region	IIB43	NW_020349959.1	3608	5462	-
	scaffold		class II-related region	IIB44	NW_020349959.1	7568	9052	-
	scaffold		class II-related region	IIB45	NW_020349959.1	11077	12626	-
	scaffold		class II-related region	IIB42	NW_020349999.1	6372	8226	-
	scaffold		class II-related region	IIB41	NW_020350050.1	289	2142	+
	scaffold		class II-related region	IIB40	NW_020350224.1	555	1656	+
	scaffold		class II-related region	IIB39	NW_020350237.1	2713	4229	-
	scaffold		class II-related region	IIB38	NW_020350298.1	8528	10080	+
	scaffold		class II-related region	IIB37	NW_020350326.1	2285	4129	-
	scaffold		class II-related region	IIB36	NW_020350366.1	12123	13675	+
	scaffold		class II-related region	IIB35-pseudo	NW_020350397.1	879	2408	+
	scaffold		class II-related region	IIA-exon3	NW_020350757.1	307	27	-
	scaffold		class II-related region	IIB34	NW_020350803.1	1560	3077	-
	scaffold		class II-related region	IIB33	NW_020350837.1	423	2267	-
	scaffold		class II-related region	IIB32	NW_020350964.1	6262	8103	-
	scaffold		class I-related region	I8	NW_020351072.1	1944	3208	+
	scaffold		class I-related region	I7	NW_020351203.1	8394	9713	-
	scaffold		class II-related region	IIB31	NW_020351229.1	5470	7234	-
	scaffold		class II-related region	IIB29	NW_020351231.1	14188	15967	-
	scaffold		class II-related region	IIB30	NW_020351231.1	19208	20724	-
	scaffold		class II-related region	IIB28	NW_020351460.1	5803	7657	-
	scaffold		class II-related region	IIB26	NW_020351818.1	9049	10565	+
	scaffold		class II-related region	IIB27	NW_020351818.1	12936	14453	+
	scaffold		class I-related region	I6	NW_020351922.1	77	1396	-
	scaffold		class II-related region	IIB25	NW_020351985.1	331	1883	+
	scaffold		class II-related region	IIB24	NW_020352224.1	14157	15743	-
	scaffold		class I-related region	I5	NW_020352417.1	10277	11541	+
	scaffold		class II-related region	IIB22	NW_020352417.1	15765	17331	+
	scaffold		class II-related region	IIB23	NW_020352417.1	30777	32582	-
	scaffold		class II-related region	IIB21	NW_020352451.1	5453	7258	-
	scaffold		class II-related region	IIB20	NW_020352459.1	4494	6010	-
	scaffold		class II-related region	IIB19	NW_020352470.1	6606	8121	-
	scaffold		class II-related region	IIB18	NW_020352502.1	10148	12002	+
	scaffold		class II-related region	IIB17	NW_020352572.1	131	1727	+
	scaffold		class II-related region	IIB16	NW_020352579.1	4749	6267	+
	scaffold		class II-related region	IIB15	NW_020352674.1	130	1726	+
	scaffold		class II-related region	IIB14	NW_020352679.1	1182	2690	+
	scaffold		class II-related region	IIB13	NW_020352729.1	61	1657	-
	scaffold		class II-related region	IIB12	NW_020352900.1	376	2154	+
	scaffold		class II-related region	IIB11	NW_020352985.1	7476	8994	+
	scaffold		class II-related region	IIB193	NW_020353209.1	8477	10321	-
	scaffold		class II-related region	IIB10	NW_020353307.1	10181	11953	-
	scaffold		class II-related region	IIB192	NW_020353361.1	7165	8691	+
	scaffold		class II-related region	IIB191	NW_020353404.1	4321	5836	+
	scaffold		class II-related region	IIB190	NW_020353420.1	175	1682	+
	scaffold		class II-related region	IIB9	NW_020353696.1	10356	12135	-
	scaffold		class I-related region	I4	NW_020353778.1	4514	5778	+
	scaffold		class II-related region	IIB189	NW_020353778.1	9991	11557	+
	scaffold		class II-related region	IIB6	NW_020353778.1	25008	26814	-
	scaffold		class II-related region	IIB7	NW_020353778.1	28896	30381	-
	scaffold		class II-related region	IIB8	NW_020353778.1	32443	33992	-
	scaffold		class I-related region	I3	NW_020353869.1	4248	5498	-
	scaffold		class I-related region	I2	NW_020354158.1	7699	9014	+
	scaffold		class II-related region	IIB188	NW_020354289.1	8701	10253	+
	scaffold		class I-related region	I1	NW_020354383.1	872	2045	+
	scaffold		class II-related region	IIB5	NW_020354560.1	389	2245	-
	scaffold		class II-related region	IIB4	NW_020354583.1	5472	7068	-
	scaffold		class II-related region	IIB186	NW_020354604.1	2648	4164	+
	scaffold		class II-related region	IIB187	NW_020354604.1	7389	8985	+
	scaffold		class II-related region	IIB3-pseudo	NW_020354632.1	1700	3228	-
	scaffold		class II-related region	IIB2-pseudo	NW_020354954.1	6777	8307	-
	scaffold		class II-related region	IIB185	NW_020354968.1	7582	9426	+
	scaffold		class II-related region	IIB184	NW_020355003.1	418	2014	+
	scaffold		class II-related region	IIB183	NW_020355059.1	3996	5850	+
	scaffold		class II-related region	IIB1	NW_020355268.1	897	2741	-
PipFil	scaffold		class II-related region	IIB68	NW_020893943.1	26075	27690	+
	scaffold		class I-related region	I15	NW_020894000.1	4142	5443	+
	scaffold		class I-related region	I13	NW_020894118.1	6096	7335	+
	scaffold		class I-related region	I14	NW_020894118.1	18771	20010	-
	scaffold		class II-related region	IIB67	NW_020894250.1	483	2021	+
	scaffold		class II-related region	IIB64	NW_020894410.1	13056	14567	+
	scaffold		class II-related region	IIB65	NW_020894410.1	17862	19337	-
	scaffold		class II-related region	IIB66-pseudo	NW_020894410.1	22072	23582	-
	scaffold		class II-related region	IIB63	NW_020894734.1	9224	10788	-
	scaffold		class II-related region	IIB62	NW_020894741.1	12978	14554	+
	scaffold		class II-related region	IIB61	NW_020894867.1	18257	19875	-
	scaffold		class II-related region	IIB60	NW_020894868.1	12076	13848	+
	scaffold		class I-related region	I12	NW_020894890.1	17035	18327	-
	scaffold		class II-related region	IIB59	NW_020894976.1	10369	12150	-
	scaffold		class II-related region	IIB57-pseudo	NW_020894989.1	3994	5506	-
	scaffold		class II-related region	IIB58	NW_020894989.1	17705	19165	+
	scaffold		class II-related region	IIB54	NW_020895086.1	9547	11143	-
	scaffold		class II-related region	IIB55	NW_020895086.1	18637	20491	-
	scaffold		class II-related region	IIB56	NW_020895086.1	23273	24871	-
	scaffold		class II-related region	IIB53	NW_020895125.1	6810	8396	+
	scaffold		class II-related region	IIB52	NW_020895140.1	16162	17673	-
	scaffold		class II-related region	IIB49	NW_020895147.1	10618	12232	+
	scaffold		class II-related region	IIB50	NW_020895147.1	21595	22948	-
	scaffold		class II-related region	IIB51-pseudo	NW_020895147.1	25123	26634	-
	scaffold		class II-related region	IIB47	NW_020895157.1	164	1751	-
	scaffold		class II-related region	IIB48	NW_020895157.1	4602	6100	-
	scaffold			COL11A2	NW_020895253.1	513432	550972	+
	scaffold		class I-related region	I11	NW_020895492.1	59284	60565	+
	scaffold		class II-related region	IIB46	NW_020895703.1	5479	7120	-
	scaffold		class II-related region	IIB45-pseudo	NW_020895740.1	1569	3080	-
	scaffold		class II-related region	IIB44-pseudo	NW_020895804.1	13298	14766	+
	scaffold		class II-related region	IIB43	NW_020895916.1	37088	38786	-
	scaffold		class II-related region	IIB42-pseudo	NW_020895998.1	13915	15383	-
	scaffold		class II-related region	IIB41-pseudo	NW_020896025.1	5013	6505	+
	scaffold		class II-related region	IIA-exon3	NW_020896058.1	2854	3133	+
	scaffold		class II-related region	IIA-exon4	NW_020896058.1	6063	6186	+
	scaffold		class I-related region	I10	NW_020896063.1	14331	15632	+
	scaffold		class I-related region	I9	NW_020896092.1	7296	8477	-
	scaffold		class II-related region	IIB37	NW_020896111.1	23093	24885	-
	scaffold		class II-related region	IIB38	NW_020896111.1	43129	44769	-
	scaffold		class II-related region	IIB39	NW_020896111.1	46802	48290	-
	scaffold		class II-related region	IIB40	NW_020896111.1	51112	52572	-
	scaffold		class II-related region	IIB35	NW_020896135.1	54213	55770	-
	scaffold		class II-related region	IIB36	NW_020896135.1	82462	84050	-
	scaffold		class II-related region	IIB33	NW_020896151.1	8588	10185	+
	scaffold		class II-related region	IIB34	NW_020896151.1	12477	14063	+
	scaffold		class II-related region	IIB30	NW_020896181.1	3351	4856	-
	scaffold		class II-related region	IIB31	NW_020896181.1	7179	8728	-
	scaffold		class II-related region	IIB32	NW_020896181.1	11472	13051	-
	scaffold		class II-related region	IIB29-pseudo	NW_020896305.1	1632	3129	-
	scaffold		class II-related region	IIB26	NW_020896332.1	11136	12750	+
	scaffold		class II-related region	IIB27	NW_020896332.1	15530	17071	+
	scaffold		class II-related region	IIB28-pseudo	NW_020896332.1	53361	55038	-
	scaffold		class II-related region	IIB21	NW_020896343.1	27286	28894	+
	scaffold		class II-related region	IIB22	NW_020896343.1	30997	32605	+
	scaffold		class II-related region	IIB23	NW_020896343.1	34881	36464	+
	scaffold		class II-related region	IIB24	NW_020896343.1	38557	40153	-
	scaffold		class II-related region	IIB25-pseudo	NW_020896343.1	43002	44573	-
	scaffold		class II-related region	IIB19	NW_020896399.1	10077	11838	-
	scaffold		class II-related region	IIB20	NW_020896399.1	23137	24732	-
	scaffold		class I-related region	I8	NW_020896414.1	6532	7777	-
	scaffold			Passer-Tap1	NW_020896487.1	19903	29435	-
	scaffold			TAP2	NW_020896487.1	36960	34065	-
	scaffold		class II-related region	IIB18	NW_020896501.1	15327	17100	+
	scaffold		class II-related region	IIB17	NW_020896616.1	5213	6776	+
	scaffold		class I-related region	I5	NW_020896616.1	46575	47740	-
	scaffold		class I-related region	I6	NW_020896616.1	133025	134225	+
	scaffold		class I-related region	I7	NW_020896616.1	176273	177473	-
	scaffold		class II-related region	IIB15	NW_020896797.1	14528	16066	-
	scaffold		class II-related region	IIB16	NW_020896797.1	32223	33735	-
	scaffold		class II-related region	IIB14	NW_020896811.1	2439	4211	+
	scaffold		class I-related region	I4	NW_020896955.1	940	2191	+
	scaffold		class II-related region	IIB12	NW_020896955.1	19469	21250	-
	scaffold		class II-related region	IIB13	NW_020896955.1	23671	25258	-
	scaffold		class II-related region	IIB11	NW_020897048.1	63283	64855	-
	scaffold		class I-related region	I3	NW_020897048.1	78181	79496	+
	scaffold		class I-related region	I2	NW_020897056.1	20006	21296	-
	scaffold		class II-related region	IIB10	NW_020897127.1	13319	14925	+
	scaffold		class II-related region	IIB9-pseudo	NW_020897177.1	6271	7768	-
	scaffold		class I-related region	I1	NW_020897333.1	3117	4362	-
	scaffold		class II-related region	IIB8-pseudo	NW_020897360.1	7993	9462	-
	scaffold		class II-related region	IIB7	NW_020897407.1	727	2271	-
	scaffold		class II-related region	IIB5	NW_020897584.1	3629	5237	-
	scaffold		class II-related region	IIB6	NW_020897584.1	12235	13816	-
	scaffold		class II-related region	IIB2	NW_020897604.1	2982	4577	+
	scaffold		class II-related region	IIB3	NW_020897604.1	11947	13423	+
	scaffold		class II-related region	IIB4-pseudo	NW_020897604.1	16209	18041	+
	scaffold		class II-related region	IIB1	NW_020897635.1	5632	7404	-
SpoHyp	scaffold			COL11A2	NDFG01000078.1	1856161	1891171	+
	scaffold			Passer-Tap1	NDFG01000208.1	13512	25267	+
	scaffold		class I-related region	I6	NDFG01000238.1	353038	354802	-
	scaffold		class II-related region	IIA-exon2	NDFG01000378.1	69756	69604	-
	scaffold		class II-related region	IIA-exon3	NDFG01000378.1	60433	60286	-
	scaffold			TAP2-unsure	NDFG01000451.1	7212	10120	+
	scaffold			Passer-Tap1	NDFG01000451.1	105750	119603	-
	scaffold		class II-related region	IIA-exon2	NDFG01000453.1	22072	22224	+
	scaffold		class II-related region	IIA-exon3	NDFG01000453.1	33118	33265	+
	scaffold		class II-related region	IIA-exon4	NDFG01000453.1	45007	45129	+
	scaffold		class II-related region	IIB3-pseudo	NDFG01000631.1	19800	22345	-
	scaffold		class I-related region	I4	NDFG01000763.1	28094	30395	-
	scaffold		class I-related region	I5-pseudo	NDFG01000763.1	38520	40684	-
	scaffold		class II-related region	IIB2	NDFG01000853.1	76902	78742	+
	scaffold			Passer-Tap1	NDFG01001307.1	21371	26829	-
	scaffold			TAP2-unsure	NDFG01001675.1	127897	134423	+
	scaffold		class I-related region	I3-pseudo	NDFG01002240.1	6916	8645	-
	scaffold		class I-related region	I2-pseudo	NDFG01003304.1	45771	47843	-
	scaffold		class I-related region	I1-pseudo	NDFG01003385.1	6100	7423	-
	scaffold		class II-related region	IIB1-pseudo	NDFG01004318.1	2716	4701	-
AcaChl	Chromosome	# 1	class II-related region	IIB1	CM029183.1	12149713	12151126	+
	Chromosome	#25		BRD2	CM029207.1	8283319	8297607	-
	Chromosome	#25		COL11A2	CM029207.1	8728501	8761186	+
	Chromosome	#29		Passer-Tap1	CM029211.1	187117	191034	+
	Chromosome	#32		TAP2	CM029214.1	4421556	4432522	+
	scaffold			BRD2	JAFCHQ010000015.1	1948	25161	-
	scaffold		class I-related region	I2	JAFCHQ010000156.1	24537	27131	-
	scaffold		class I-related region	I3-pseudo	JAFCHQ010000156.1	43390	45488	-
	scaffold		class I-related region	I4	JAFCHQ010000156.1	62931	65052	-
	scaffold		class I-related region	I5	JAFCHQ010000156.1	79516	81543	-
	scaffold		class I-related region	I6	JAFCHQ010000156.1	94406	97007	-
	scaffold		class I-related region	I1-pseudo	JAFCHQ010000177.1	40643	42517	-
	scaffold		class II-related region	IIB2	JAFCHQ010000185.1	10424	12727	+
	scaffold		class II-related region	IIB3	JAFCHQ010000185.1	20926	23549	+
	scaffold		class II-related region	IIB4	JAFCHQ010000185.1	29872	32491	+
	scaffold		class II-related region	IIB5-pseudo	JAFCHQ010000185.1	39385	41534	+
	scaffold		class II-related region	IIB6	JAFCHQ010000185.1	59057	61579	-
	scaffold		class II-related region	IIB7-pseudo	JAFCHQ010000185.1	67597	69829	-
	scaffold		class II-related region	IIB8	JAFCHQ010000185.1	71984	74927	-
	scaffold		class II-related region	IIA-exon2	JAFCHQ010000185.1	78727	78922	+
	scaffold		class II-related region	IIA-exon3	JAFCHQ010000185.1	80872	81118	+
	scaffold		class II-related region	IIA-exon4	JAFCHQ010000185.1	82471	82615	+
CatUst	Chromosome	#21		COL11A2	CM020356.1	8268359	8308010	+
	Chromosome	#25	class II-related region	IIB1	CM020360.1	8133366	8135222	-
	Chromosome	#36	class II-related region	IIB2	CM020371.1	51381	53083	-
	Chromosome	#36	class I-related region	I1	CM020371.1	93342	95128	-
	Chromosome	#36	class I-related region	I2	CM020371.1	106019	107322	-
	Chromosome	#36	class I-related region	I3	CM020371.1	137026	141393	+
	Chromosome	#36	class II-related region	IIB3	CM020371.1	1628121	1629798	+
	Chromosome	#36	class II-related region	IIB4	CM020371.1	1632470	1638773	+
	Chromosome	#36	class II-related region	IIB5	CM020371.1	1638667	1640380	-
	scaffold			Passer-Tap1	WNMQ02000132.1	553537	559952	-
	scaffold			TAP2	WNMQ02000132.1	563683	565993	+
	scaffold		class II-related region	IIA-exon2	WNMQ02000153.1	155220	155025	-
	scaffold		class II-related region	IIA-exon3	WNMQ02000153.1	150856	150592	-
	scaffold		class II-related region	IIA-exon4	WNMQ02000153.1	148714	148593	-
ChiLan	Chromosome	#21		COL11A2	CM020553.1	3169523	3207608	-
	Chromosome	#33		TAP2	CM020565.1	527257	530379	-
	Chromosome	#33		Passer-Tap1	CM020565.1	534694	544323	+
	scaffold		class II-related region	IIB4	WNMC01000038.1	26215	27844	+
	scaffold		class II-related region	IIB5	WNMC01000038.1	33358	34976	-
	scaffold		class II-related region	IIB6	WNMC01000038.1	82103	83875	+
	scaffold		class II-related region	IIB7	WNMC01000038.1	86817	88393	+
	scaffold		class II-related region	IIB8-pseudo	WNMC01000038.1	90110	91673	+
	scaffold		class II-related region	IIB9	WNMC01000038.1	94665	96191	+
	scaffold		class II-related region	IIB10	WNMC01000038.1	130335	131931	-
	scaffold		class II-related region	IIB11	WNMC01000038.1	190180	191760	-
	scaffold		class I-related region	I1	WNMC01000038.1	198739	199943	-
	scaffold		class II-related region	IIB12	WNMC01000038.1	258482	259979	+
	scaffold		class II-related region	IIB13	WNMC01000038.1	288964	290460	+
	scaffold		class I-related region	I2	WNMC01000038.1	328612	329816	-
	scaffold		class I-related region	I3	WNMC01000038.1	329555	346555	+
	scaffold		class II-related region	IIB1	WNMC01000052.1	389	2029	-
	scaffold		class II-related region	IIB2	WNMC01000052.1	4483	6143	-
	scaffold		class II-related region	IIB3	WNMC01000052.1	8192	9874	-
	scaffold		class I-related region	I4	WNMC01000066.1	3278	4496	-
	scaffold		class I-related region	I5	WNMC01000066.1	82053	83271	+
CorMon	Contig			COL11A2	NC_045496.1	3107315	3139675	-
	Contig		class I-related region	I1	NC_045506.1	571665	572933	+
	Contig		class I-related region	I2	NC_045506.1	687165	688387	-
	Contig		class I-related region	I3	NC_045506.1	699761	700983	-
	Contig		class II-related region	IIB5-pseudo	NW_022436882.1	42699	42944	-
	Contig		class II-related region	IIB1	NW_022436882.1	42723	45398	+
	Contig		class II-related region	IIB2	NW_022436882.1	55821	57780	-
	Contig		class II-related region	IIB3	NW_022436882.1	67079	69754	-
	Contig		class II-related region	IIB4	NW_022436882.1	107126	109499	-
	Contig			TAP2	NW_022436940.1	91052	95572	-
	Contig			Passer-Tap1	NW_022436940.1	97377	104072	+
	Contig
GeoTri	scaffold			COL11A2	CM019920.1	9044123	9005585	-
	Chromosome	#31	class II-related region	IIB1	CM019931.1	5310	7562	-
	Chromosome	#31	class I-related region	I1	CM019931.1	101937	103501	-
	Chromosome	#31	class II-related region	IIB2	CM019931.1	476143	478360	-
	Chromosome	#31	class II-related region	IIB7	CM019931.1	677688	679482	+
	scaffold		class II-related region	IIB3	WSPJ01000038.1	3148	4807	+
	scaffold		class I-related region	I2	WSPJ01000038.1	155765	157720	+
	scaffold		class I-related region	I3	WSPJ01000038.1	268968	270805	-
	scaffold			TAP2	WSPJ01000163.1	11914	24990	-
	scaffold			Passer-Tap1-partical	WSPJ01000163.1	30801	31776	+
	scaffold		class II-related region	IIA-exon2	WSPJ01000254.1	3152	3004	-
	scaffold		class II-related region	IIB4	WSPJ01000254.1	9170	10952	+
	scaffold		class II-related region	IIB5	WSPJ01000254.1	13139	15201	+
	scaffold		class II-related region	IIB6	WSPJ01000254.1	17046	19575	+
SylAtr	Chromosome	#19		COL11A2	CM020483.1	8316825	8349417	+
	Chromosome	#25		TAP2-partical	CM020489.1	75764	76271	-
	Chromosome	#31	class II-related region	IIB4	CM020495.1	5701	7465	+
	Chromosome	#31	class II-related region	IIB5-pseudo	CM020495.1	252352	254045	+
	Chromosome	#31	class II-related region	IIB6	CM020495.1	288087	289780	+
	Chromosome	#32		Passer-Tap1	CM020496.1	81066	87742	+
	scaffold		class II-related region	IIB2	WNMY01000078.1	5105	6830	+
	scaffold		class II-related region	IIB3	WNMY01000078.1	14434	16940	+
	scaffold		class II-related region	IIB1	WNMY01000078.1	25738	27504	+
	scaffold		class I-related region	I3	WNMY01000180.1	37374	38761	-
	scaffold		class I-related region	I4	WNMY01000186.1	54855	56132	+
TaeGut	Chromosome	#17		BRD2	NC_045015.1	7850402	7862503	-
	Chromosome	#17		COL11A2	NC_045015.1	8253085	8286074	+
	scaffold			I-exon4	NW_022611479.1	264	55	-
	scaffold			II-exon3	NW_022611479.1	282	24	-
	scaffold			II-exon4	NW_022611479.1	107	9	-
	scaffold			TAP2-partical	NW_022611479.1	786884	789362	+
	scaffold		class II-related region	IIB1	NW_022611542.1	10523	13330	-
	scaffold		class II-related region	IIB2	NW_022611542.1	32371	36204	-
	scaffold		class II-related region	IIB3	NW_022611542.1	45998	48663	+
	scaffold		class II-related region	IIB4	NW_022611542.1	52004	54327	+
	scaffold		class II-related region	IIB5	NW_022611542.1	58329	61191	+
	scaffold		class II-related region	IIB6	NW_022611542.1	73864	77604	-
	scaffold		class II-related region	IIB7	NW_022611542.1	80765	82629	+
	scaffold		class II-related region	IIB8	NW_022611542.1	87576	89796	+
	scaffold		class II-related region	IIB9	NW_022611542.1	94605	97096	+
	scaffold		class II-related region	IIB10	NW_022611542.1	102092	104123	+
	scaffold		class II-related region	IIB11	NW_022611542.1	108415	110820	+
	scaffold		class II-related region	IIB12	NW_022611545.1	150565	152790	-
	scaffold		class I-related region	I1	NW_022611545.1	308778	310660	+
	scaffold			BRD2	NW_022611549.1	12933	34024	-
	scaffold		class II-related region	IIB13	NW_022611573.1	3314773	3316807	+
	scaffold		class II-related region	IIB14	NW_022611573.1	3925495	3927343	+

## Sheet: TableS6
Table S6 Gene arrangement of MHC-related gene in Palaeognathae SGS-based avian genomes. The same contigs were marked with gray and white to be more apparent.
Species	Gene	Contig	Stard position	End position	Completely gene or not
Anodid	COL11A2	SZQC01000727.1	8892	20020
Anodid	IIB	SZQC01000727.1	31848	59730	no-complete
Anodid	BRD2	SZQC01000727.1	36587	40694
Anodid	DMA	SZQC01000727.1	48868	49276
Anodid	DMB1	SZQC01000727.1	58563	59733
Anodid	DMB2	SZQC01000727.1	58563	59912
Anodid	I	SZQC01000727.1	62073	63082	no-complete
Apthas	IIB	PTFD01000021.1	2397350	2397570	no-complete
Apthas	I	PTFD01000851.1	254393	255581
Apthas	IIA	PTFD01001787.1	962	1681
Apthas	COL11A2	PTFD01001787.1	11516	23472
Apthas	DMA	PTFD01001851.1	3191	3800
Apthas	BRD2	PTFD01001851.1	16659	21382
Apthas	IIB	PTFD01001851.1	23607	24195
Apthas	DMB1	PTFD01002269.1	385	1055
Apthas	DMB2	PTFD01002269.1	385	1260
Apthas	IIB	PTFD01002269.1	932	1030	no-complete
Apthas	I	PTFD01002269.1	4017	4725	no-complete
Apthas	IIA	PTFD01002343.1	547	1085
Apthas	I	PTFD01002358.1	10	742	no-complete
Apthas	I	PTFD01002636.1	6	1330
Apthas	I	PTFD01003381.1	1167	903	no-complete
Apthas	IIB	PTFD01004091.1	1	763	no-complete
Apthas	TAP1	Unsure			no-complete
Apthas	TAP2	Unsure			no-complete
Apthas	TAPBL	Unsure			no-complete
Aptman	COL11A2	LK065701.1	2258	14443
Aptman	I	LK066315.1	2	1991
Aptman	BRD2	LK068718.1	3264	11709
Aptman	DMB1	LK068718.1	23354	24051
Aptman	DMB1	LK068718.1	28695	30223
Aptman	DMB2	LK068718.1	28695	30733
Aptman	I	LK068718.1	32898	35285
Aptman	IIB	LK068718.1	283	832	no-complete
Aptman	I	LK072330.1	1490	3405	no-complete
Aptman	IIA	LK075717.1	2957	4151
Aptman	IIB	LK075717.1	6527	9615	no-complete
Aptman	IIA	LK083033.1	512	877
Aptman	IIB	LK094994.1	12974	13555
Aptman	I	LK095308.1	1	1400
Aptman	I	LK095308.1	1858	2560	no-complete
Aptman	TAP1				no-complete
Aptman	TAP2				no-complete
Aptman	TAPBL				no-complete
Aptowe	IIB	PTFC01000098.1	1037597	1037827	no-complete
Aptowe	I	PTFC01001001.1	210620	211817
Aptowe	I	PTFC01001258.1	5895	6977
Aptowe	I	PTFC01001258.1	29330	30793
Aptowe	I	PTFC01001258.1	47301	48270
Aptowe	I	PTFC01001258.1	58279	58716	no-complete
Aptowe	TAP2	PTFC01001258.1	33442	36363	no-complete
Aptowe	DMB2	PTFC01001258.1	61473	62348
Aptowe	IIB	PTFC01001258.1	84833	85414
Aptowe	IIB	PTFC01001258.1	91477	102990
Aptowe	DMB1	PTFC01001258.1	61962	62109
Aptowe	DMB1	PTFC01001258.1	66606	68278
Aptowe	DMA	PTFC01001258.1	69228	69837
Aptowe	BRD2	PTFC01001258.1	77854	82785
Aptowe	TAP1	PTFC01001258.1	41786	42580	no-complete
Aptowe	I	PTFC01001285.1	22872	33622
Aptowe	COL11A2	PTFC01001418.1	9954	22762
Aptowe	IIA	PTFC01001418.1	32611	32848	no-complete
Aptowe	IIB	PTFC01001418.1	34907	36001
Aptowe	IIB	PTFC01001418.1	41497	42594
Aptowe	IIB	PTFC01001418.1	47576	48670
Aptowe	IIB	PTFC01001418.1	57728	58467	no-complete
Aptowe	I	PTFC01001434.1			no-complete
Aptowe	I	PTFC01001590.1			no-complete
Aptowe	IIA	PTFC01001805.1	5537	6075
Aptowe	TAPBL				no-complete
Aptrow	IIB	PTFB01001375.1	11224	36299
Aptrow	BRD2	PTFB01001375.1	15534	22179
Aptrow	DMA	PTFB01001375.1	28450	28639	no-complete
Aptrow	DMB1	PTFB01001375.1	30507	31870
Aptrow	DMB2	PTFB01001375.1	36020	36507
Aptrow	I	PTFB01001375.1	38622	53117
Aptrow	TAP2-exon	PTFB01001375.1	58618	58146	no-complete
Aptrow	TAP2-exon	PTFB01001381.1	28049	28530	no-complete
Aptrow	I	PTFB01001381.1	40607	58964	no-complete
Aptrow	IIA	PTFB01001446.1	3896	4435
Aptrow	COL11A2	PTFB01001446.1	20073	31672
Aptrow	IIA	PTFB01001446.1	41838	42616
Aptrow	IIB	PTFB01001446.1	44512	45542	no-complete
Aptrow	I	PTFB01001574.1	9312	10476
Aptrow	TAP2-exon	PTFB01001645.1	1010	2431	no-complete
Aptrow	I	PTFB01001645.1	8275	8972	no-complete
Aptrow	I	PTFB01001743.1	4001	14365
Aptrow	IIA	PTFB01001772.1	1255	7075
Aptrow	IIB	PTFB01001772.1	3655	4742
Aptrow	TAPBL	PTFB01002053.1	6585	9163	no-complete
Aptrow	I	PTFB01002332.1	4138	5471
Aptrow	IIB	PTFB01002508.1	252	1337
Cascas	BRD2	PTFA01000733.1	247	6737
Cascas	IIB	PTFA01000733.1	8512	9405
Cascas	IIA	PTFA01000733.1	11352	12054
Cascas	COL11A2	PTFA01000733.1	20755	32212
Cascas	DMA	PTFA01001356.1	2425	3210
Cascas	DMB1	PTFA01001356.1	3875	5360
Cascas	DMB2	PTFA01001356.1	3875	4950
Cascas	TAP2	PTFA01001627.1	1013	1623	no-complete
Cascas	TAP1-exon	PTFA01001627.1	1133	1295	no-complete
Cascas	TAP2	PTFA01001635.1	4301	5953	no-complete
Cascas	I	PTFA01001635.1	32	887	no-complete
Cascas	IIB	PTFA01002258.1	4684	4875	no-complete
Ccycin	COL11A2	PTEZ01001347.1	6607	17264
Ccycin	IIA	PTEZ01001347.1	25875	45867
Ccycin	IIB	PTEZ01001347.1	28130	48637
Ccycin	BRD2	PTEZ01001347.1	50246	56931
Ccycin	DMA	PTEZ01001347.1	64110	64705
Ccycin	DMB1	PTEZ01001347.1	67709	69534
Ccycin	DMB2	PTEZ01001347.1	67709	69534
Ccycin	I	PTEZ01003405.1	776	1735
Ccycin	TAP1-exon	PTEZ01003405.1	5137	4950	no-complete
Ccycin	I	PTEZ01003452.1	75	6815
Ccycin	I	PTEZ01004097.1	3567	4911	no-complete
Ccycin	I	PTEZ01005909.1	232	1191
Crysou	IIA	VWPX01001259.1	1676	1559	no-complete
Crysou	IIB	VWPX01001259.1	3250	9342
Crysou	IIB	VWPX01002263.1	4444	4943	no-complete
Crysou	DMA	VWPX01002813.1	10	115	no-complete
Crysou	IIB	VWPX01013370.1	881	5961	no-complete
Crysou	TAP2-exon	VWPX01015050.1	3781	4201	no-complete
Crysou	IIB	VWPX01015387.1	689	1515
Crysou	BRD2	VWPX01015387.1	2948	9792
Crysou	COL11A2	VWPX01017781.1	2170	13964
Crysou	I	VWPX01020776.1	112	1067
Crysou	TAP1-exon	VWPX01033033.1	3781	4201	no-complete
Cryund	I	VWPW01001576.1	438	1405
Cryund	I	VWPW01002316.1			no-complete
Cryund	TAP2-exon	VWPW01002698.1	1674	2130	no-complete
Cryund	I	VWPW01002698.1			no-complete
Cryund	IIA	VWPW01002713.1	5362	6045
Cryund	IIB	VWPW01002713.1	2835	3812
Cryund	I	VWPW01010378.1	342	968	no-complete
Cryund	I	VWPW01011769.1	471	1169
Cryund	I	VWPW01015736.1	204	825	no-complete
Cryund	I	VWPW01017122.1	378	980	no-complete
Cryund	COL11A2	VWPW01018464.1	8	5354
Cryund	IIA	VWPW01021053.1	430	1115
Cryund	TAP1-exon	VWPW01021116.1	237	50	no-complete
Cryund	BRD2	VWPW01024773.1	37143	51854
Cryund	IIA	VWPW01026346.1	449	267	no-complete
Cryund	IIB	VWPW01026346.1	2011	2254	no-complete
Cryund	IIB	VWPW01026378.1	2199	3174
Cryund	IIA	VWPW01026378.1	689	450	no-complete
Cryund	DMA	VWPW01029052.1	220	474	no-complete
Cryund	DMB1	VWPW01029052.1	3324	5254
Cryund	I	VWPW01030457.1	210	715	no-complete
Dronov	IIB	CM027945.1	4560618	4561750	no-complete
Dronov	BRD2	CM027960.1	8962195	8980791
Dronov	COL11A2	CM027960.1	9471312	9516901
Dronov	I	JABVCD010000355.1	48422	49518
Dronov	I	JABVCD010000392.1	31632	32741
Dronov	I	JABVCD010000392.1	224621	225725
Dronov	I	JABVCD010000392.1	240619	241735
Dronov	I	JABVCD010000392.1	290721	291835
Dronov	I	JABVCD010000392.1	332189	333303
Dronov	I	JABVCD010000392.1	433770	433184
Dronov	I	JABVCD010000392.1	523739	522138
Dronov	I	JABVCD010000392.1	656702	656106
Dronov	I	JABVCD010000392.1	766593	766593
Dronov	I	JABVCD010000598.1	115666	116354	no-complete
Dronov	I	JABVCD010000598.1	216438	217126	no-complete
Dronov	I	JABVCD010000598.1	261813	261813	no-complete
Eudele	DMB1	PTEX01000507.1	27986	28092
Eudele	I	PTEX01000507.1	42216	43176
Eudele	TAP2-exon	PTEX01000507.1	48546	48053	no-complete
Eudele	TAP1	PTEX01000507.1	53766	54006	no-complete
Eudele	DMB2	PTEX01000507.1	58266	59626
Eudele	DMA	PTEX01000507.1	62235	62060	no-complete
Eudele	BRD2	PTEX01000507.1	67301	73074
Eudele	IIB	PTEX01000507.1	74970	75765
Eudele	IIB	PTEX01000507.1	79592	80580
Eudele	IIA	PTEX01000507.1	77617	78198
Eudele	IIA	PTEX01000507.1	82050	82289
Eudele	COL11A2	PTEX01000507.1	90949	102496
Notjul	I	VZSV01000442.1	78423	78812	no-complete
Notjul	BRD2	VZSV01000442.1	97167	100917
Notjul	IIB	VZSV01000442.1	102626	103429
Notjul	IIB	VZSV01000442.1	107639	108631
Notjul	IIA	VZSV01000442.1	110210	110347	no-complete
Notjul	COL11A2	VZSV01000442.1	119636	131612
Notjul	DMB1	VZSV01000877.1	205	2482
Notjul	TAP2-exon	VZSV01001478.1	118	583	no-complete
Notjul	I	VZSV01001478.1	6312	7292
Nonig	BRD2	WBNA01000741.1	12601	18600
Nonig	IIB	WBNA01000741.1	20396	20632	no-complete
Nonig	IIB	WBNA01000741.1	25574	26566
Nonig	IIA	WBNA01000741.1	28135	28817
Nonig	COL11A2	WBNA01000741.1	37482	49423
Nonig	I	WBNA01000744.1	58161	58983
Nonig	TAP2-exon	WBNA01000744.1	65562	65082	no-complete
Notorn	COL11A2	VZSH01000546.1	12537	24305
Notorn	IIA	VZSH01000546.1	33624	33434	no-complete
Notorn	IIB	VZSH01000546.1	35129	36113
Notorn	IIB	VZSH01000546.1	40657	41496
Notorn	BRD2	VZSH01000546.1	44122	48432
Notorn	I	VZSH01000567.1	8038	8987
Notpen	COL11A2	VZSG01001636.1	2065	13842
Notpen	IIA	VZSG01001636.1	22256	22911
Notpen	IIB	VZSG01001636.1	24472	25456
Notpen	IIB	VZSG01001636.1	29776	30615
Notpen	IIA	VZSG01001636.1	27138	27745
Notpen	BRD2	VZSG01001636.1	33038	37335
Notpen	I	VZSG01002134.1	10647	11180	no-complete
Notpen	I	VZSG01003149.1	68	1020
Notper	DMB1	PTEW01000525.1	35967	36112	no-complete
Notper	I	PTEW01000525.1	55152	56101
Notper	TAP2	PTEW01000525.1	58219	60849	no-complete
Notper	TAPBL	PTEW01000525.1	69109	69631	no-complete
Notper	TAP1-exon	PTEW01000525.1	71408	71590	no-complete
Notper	DMB1	PTEW01000525.1	75885	75650	no-complete
Notper	DMA	PTEW01000525.1	82149	81994	no-complete
Notper	BRD2	PTEW01000525.1	91984	96317
Notper	IIB	PTEW01000525.1	98481	99320
Notper	IIA	PTEW01000525.1	101346	101953
Notper	IIB	PTEW01000525.1	103912	104896
Notper	IIA	PTEW01000525.1	106437	107092
Notper	COL11A2	PTEW01000525.1	115234	126988
Rheame	I	PTEV01000601.1	36591	37702
Rheame	I	PTEV01000601.1	42331	42824	no-complete
Rheame	TAP2	PTEV01000601.1	26504	26412	no-complete
Rheame	TAP1	PTEV01000601.1	34201	34392	no-complete
Rheame	DMA	PTEV01000601.1	56795	56624	no-complete
Rheame	BRD2	PTEV01000601.1	62721	68686
Rheame	IIB	PTEV01000601.1	70832	71754
Rheame	IIA	PTEV01000601.1	73330	73903
Rheame	COL11A2	PTEV01000601.1	81972	86791
Rheame	DMB1	PTEV01000601.1	45143	46986
Rhepen	I	PTJI01000579.1	67317	71334
Rhepen	I	PTJI01000579.1	71816	72443	no-complete
Rhepen	TAP2-exon	PTJI01000579.1	52878	52400	no-complete
Rhepen	TAP1-exon	PTJI01000579.1	60424	60585	no-complete
Rhepen	DMB1	PTJI01000579.1	74764	76550
Rhepen	DMA	PTJI01000579.1	84347	84941
Rhepen	BRD2	PTJI01000579.1	90233	96380
Rhepen	IIB	PTJI01000579.1	98510	99455
Rhepen	IIA	PTJI01000579.1	100902	101475
Rhepen	COL11A2	PTJI01000579.1	109724	120994
Strcam	IIA	JJRT01055484.1	488	348	no-complete
Strcam	IIB	JJRT01072373.1	292	33	no-complete
Strcam	IIB	KL206225.1	289303	289512	no-complete
Strcam	I	KL206978.1	86178	87171	no-complete
Strcam	BRD2	KL206978.1	105423	109532
Strcam	IIB	KL206978.1	112518	112364	no-complete
Strcam	IIA	KL206978.1	115216	116074
Strcam	COL11A2	KL206978.1	125241	130403
Tingut	TAP2-exon	KL886235.1	4	288	no-complete
Tingut	IIB	KL887783.1	5809	6355	no-complete
Tingut	COL11A2	KL888090.1	2005	13509
Tingut	IIA	KL888146.1	432	1093
Tingut	IIA	KL888146.1	6806	7445
Tingut	IIB	KL888146.1	4890	5232	no-complete
Tingut	IIA	KL889703.1	1119	1806	no-complete
Tingut	IIB	KL889703.1	3353	3596	no-complete
Tingut	I	KL893531.1	1	471	no-complete
Tingut	BRD2	KL895650.1	12395	26920
